# Supplementary material for: Rh-Catalyzed C–H activation/intramolecular condensation for the construction of benzo[f]pyrazolo[1,5-a][1,3]diazepines
Source: Royal Society of Chemistry journal article supplement (doi:10.1039/d0ob00382d), 2020-01-01
Supplement: d0ob00382d1.pdf [file d0ob00382d1.pdf]

## *Electronic Supplementary Information*

### **Rh-catalyzed C-H activation/intramolecular condensation for construction of benzo[*f*]pyrazolo[1,5-*a*][1,3]diazepines**

Yi Ning, Xinwei He,\* Youpeng Zuo, Jian Wang, Qiang Tang, Mengqing Xie, Ruxue  
Li, Yongjia Shang\*

*Key Laboratory of Functional Molecular Solids, Ministry of Education, Anhui  
Laboratory of Molecule-Based Materials (State Key Laboratory Cultivation Base),  
College of Chemistry and Materials Science, Anhui Normal University, Wuhu 241002,  
P.R. China*

Copies of <sup>1</sup>H, and <sup>13</sup>C NMR Spectra for all compounds-----S2-S27

X-Ray Crystallography structures of Compounds **3a**-----S28

X-Ray Crystallography structures of Compounds **5b**-----S29

# Copies of $^1\text{H}$ and $^{13}\text{C}$ NMR Spectra

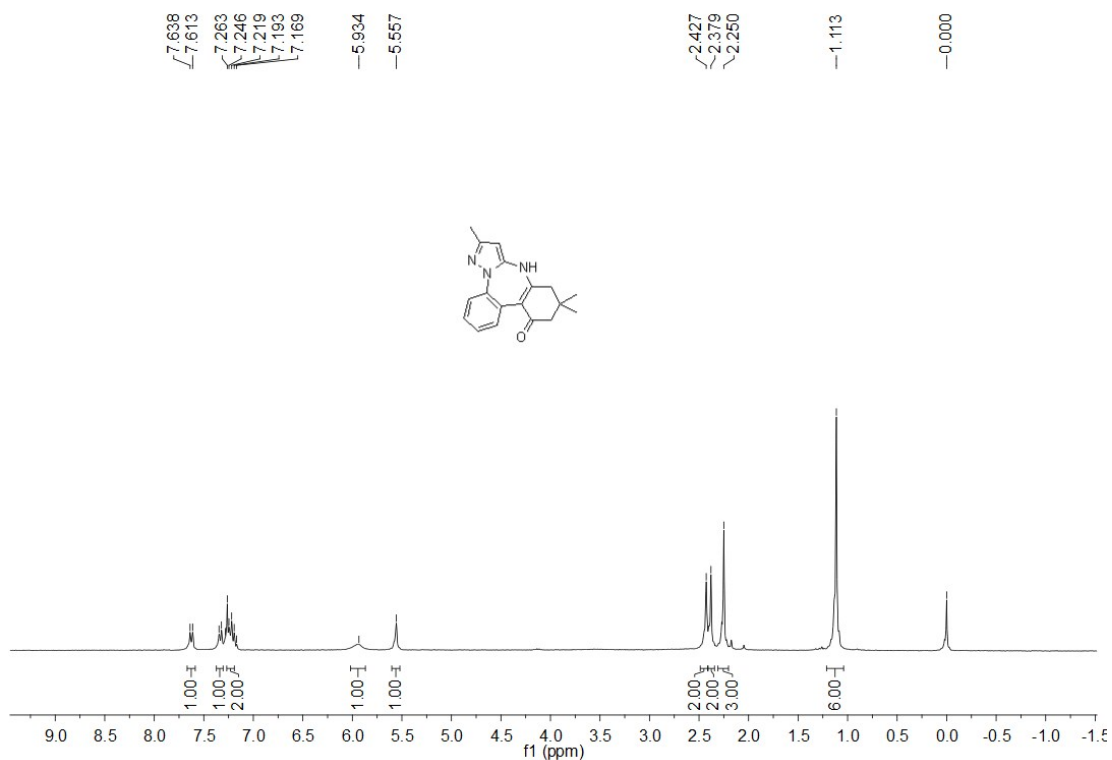

$^1\text{H}$  NMR Spectrum of Compound 3a

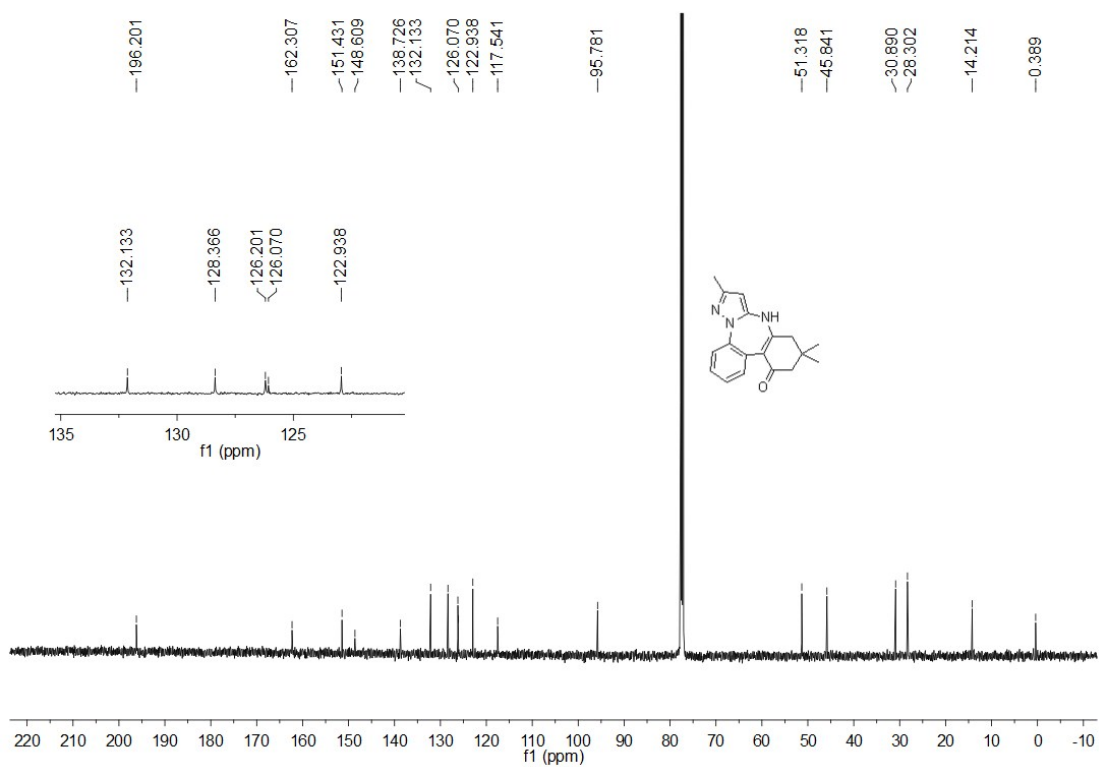

$^{13}\text{C}$  NMR Spectrum of Compound 3a

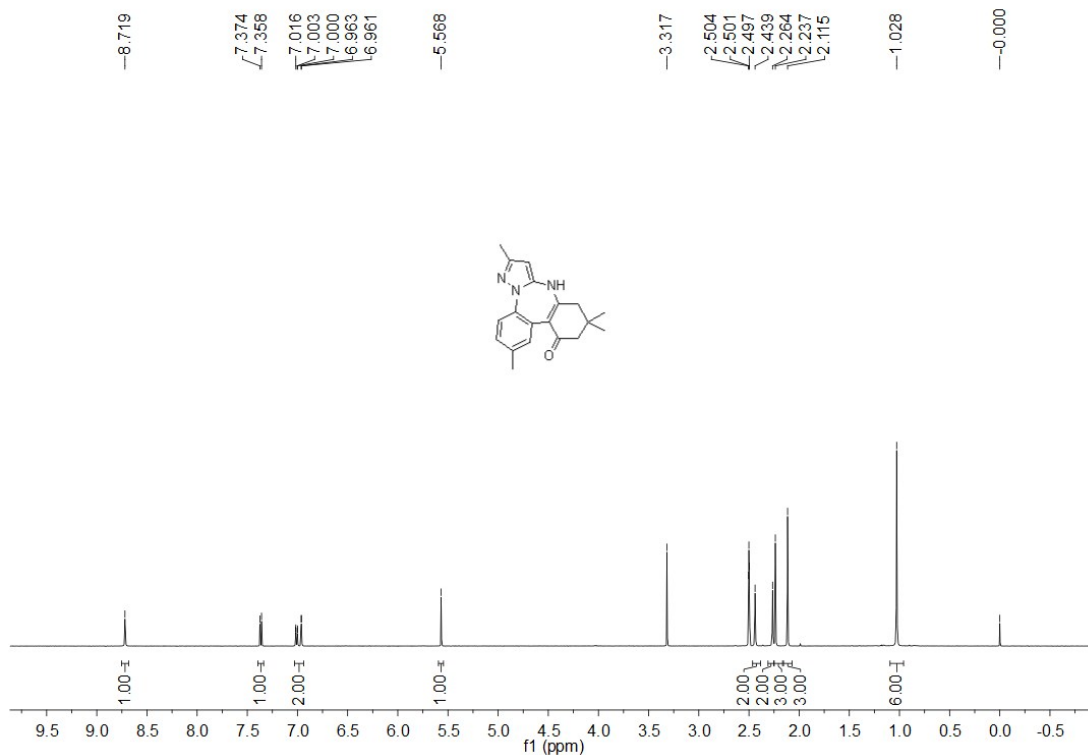

<sup>1</sup>H NMR Spectrum of Compound 3b

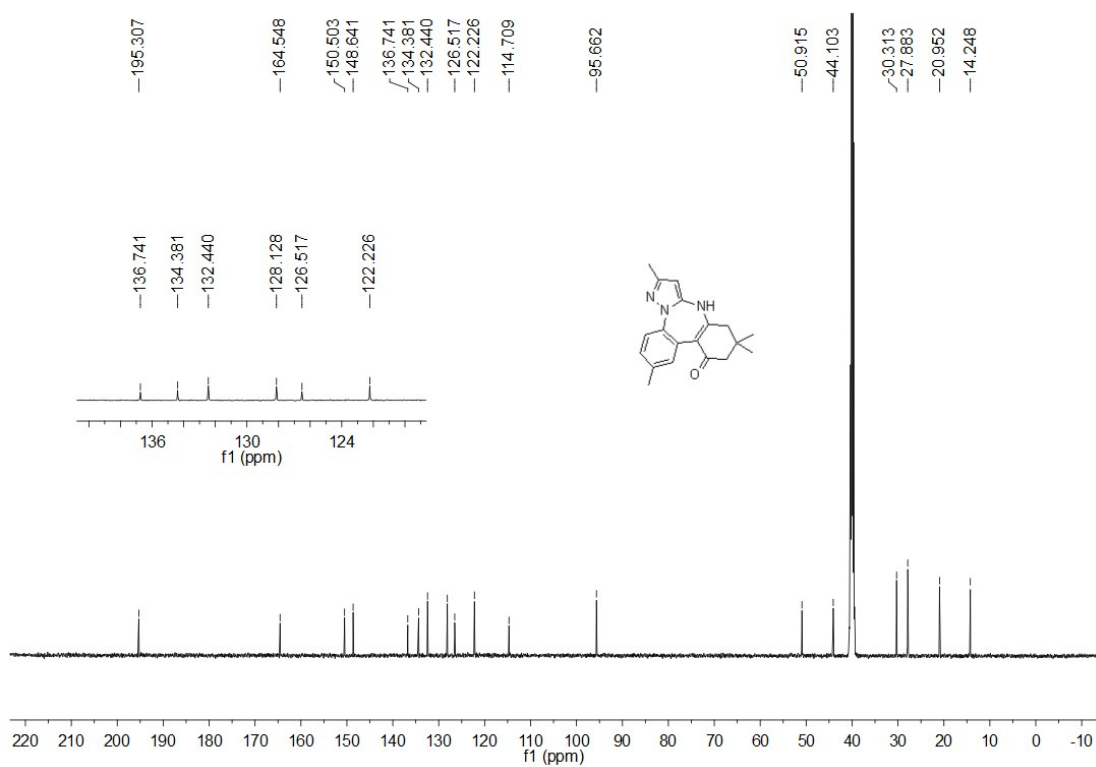

<sup>13</sup>C NMR Spectrum of Compound 3b

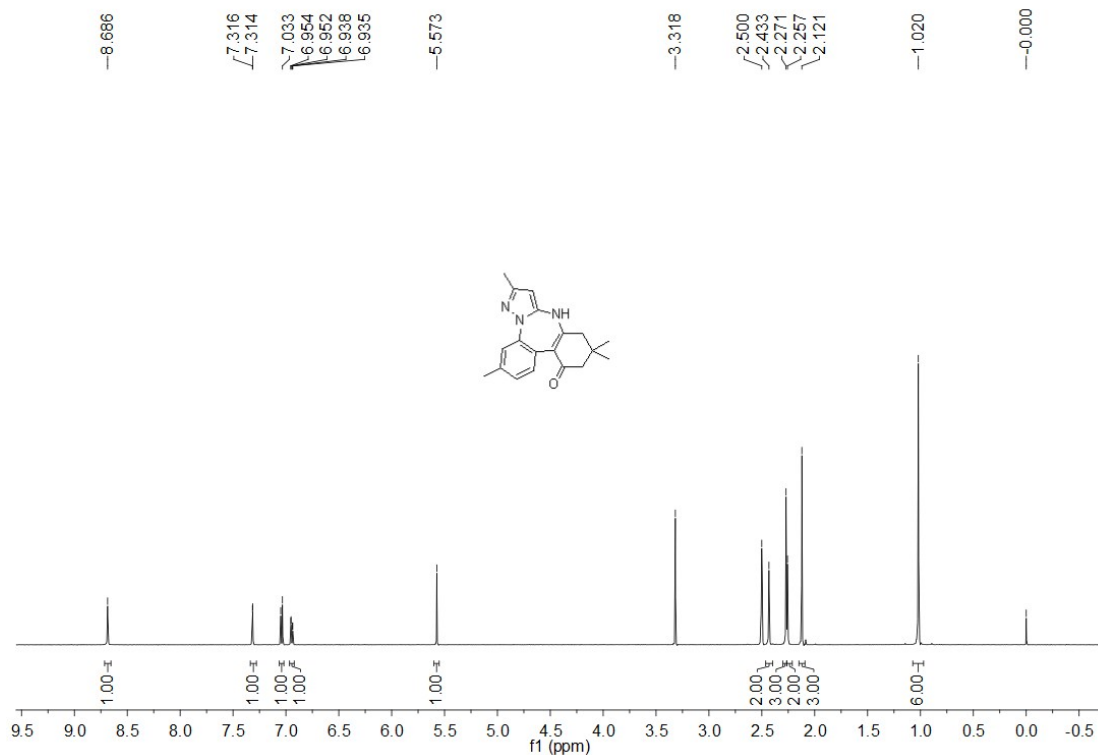

<sup>1</sup>H NMR Spectrum of Compound 3c

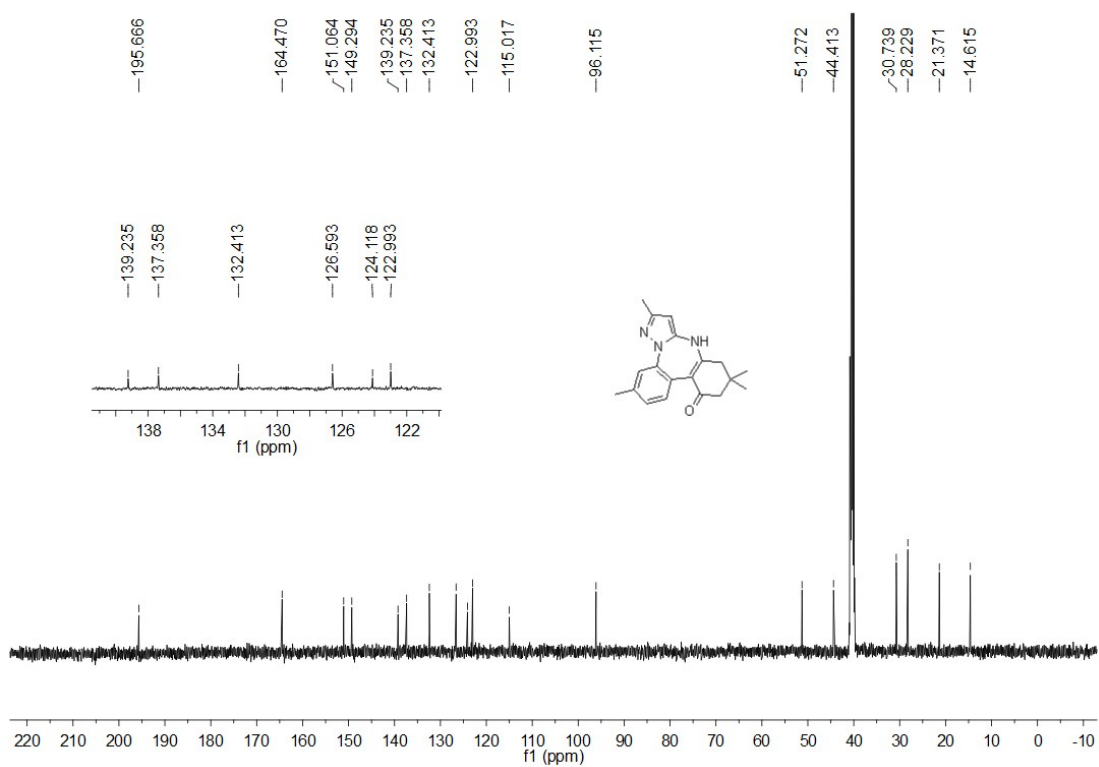

<sup>13</sup>C NMR Spectrum of Compound 3c

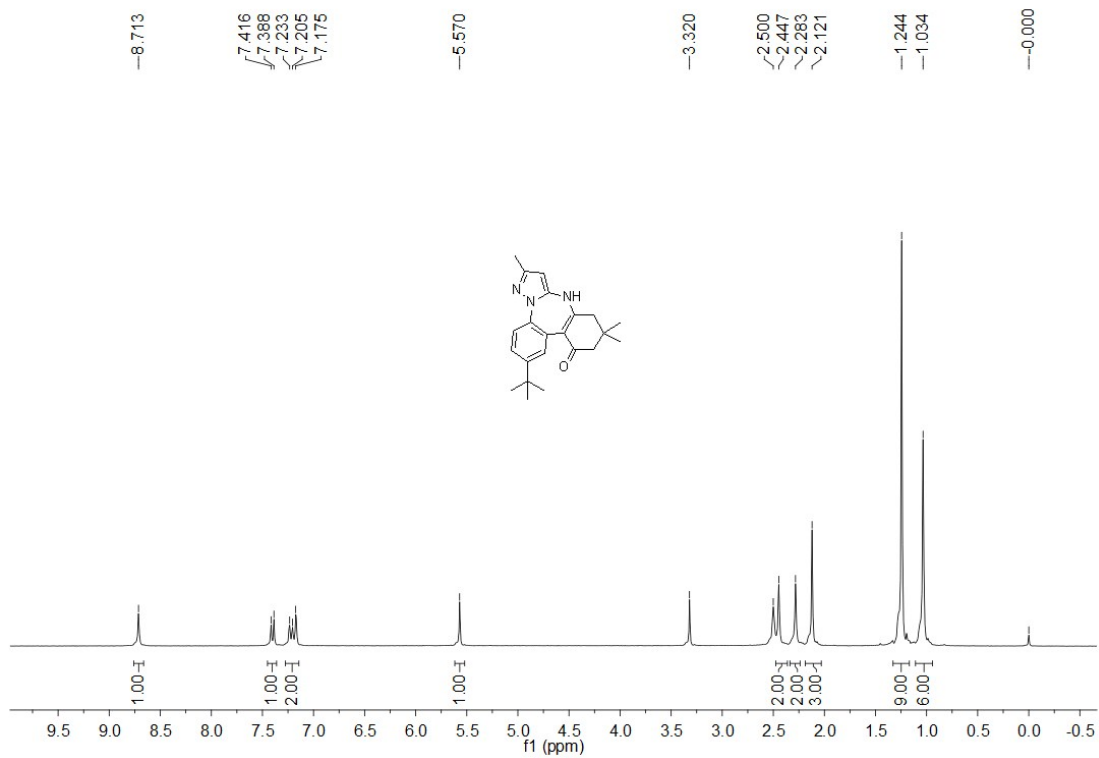

<sup>1</sup>H NMR Spectrum of Compound 3d

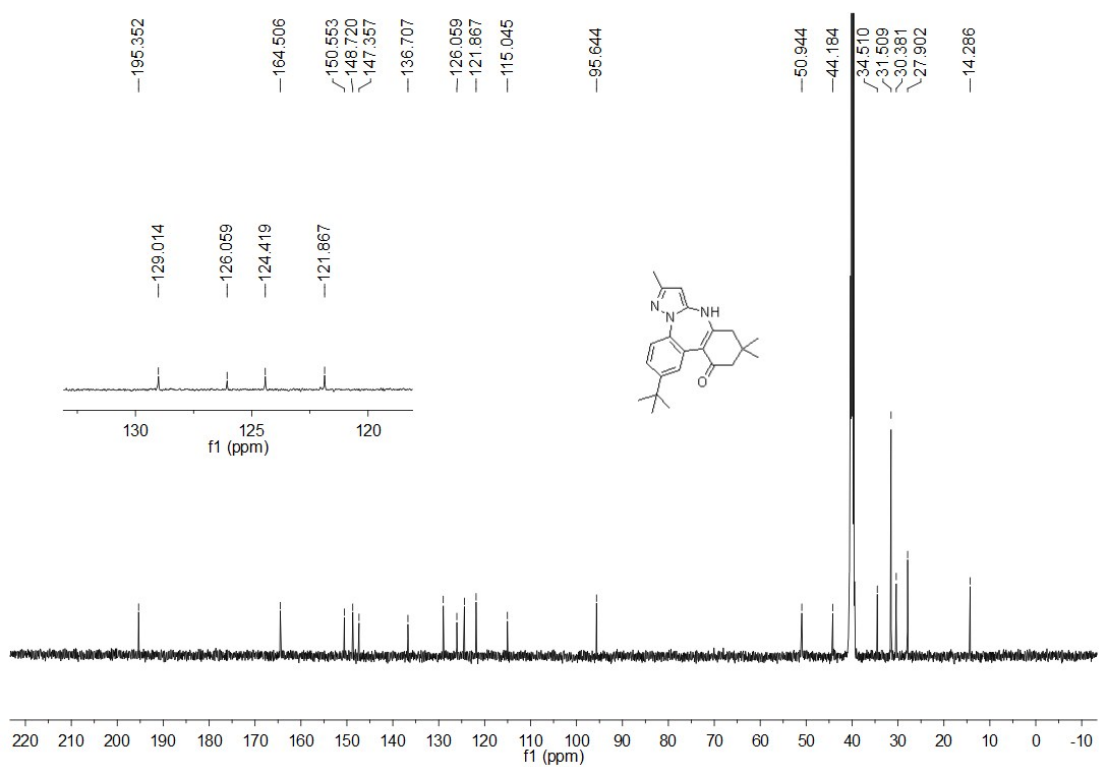

<sup>13</sup>C NMR Spectrum of Compound 3d

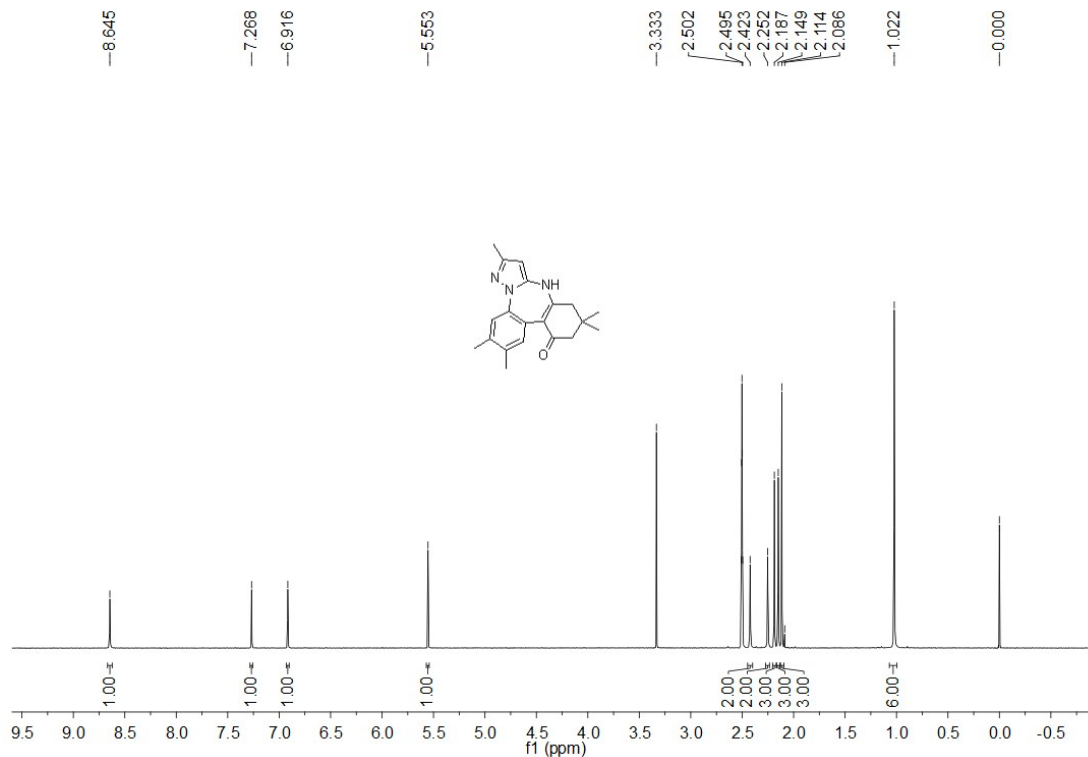

<sup>1</sup>H NMR Spectrum of Compound 3e

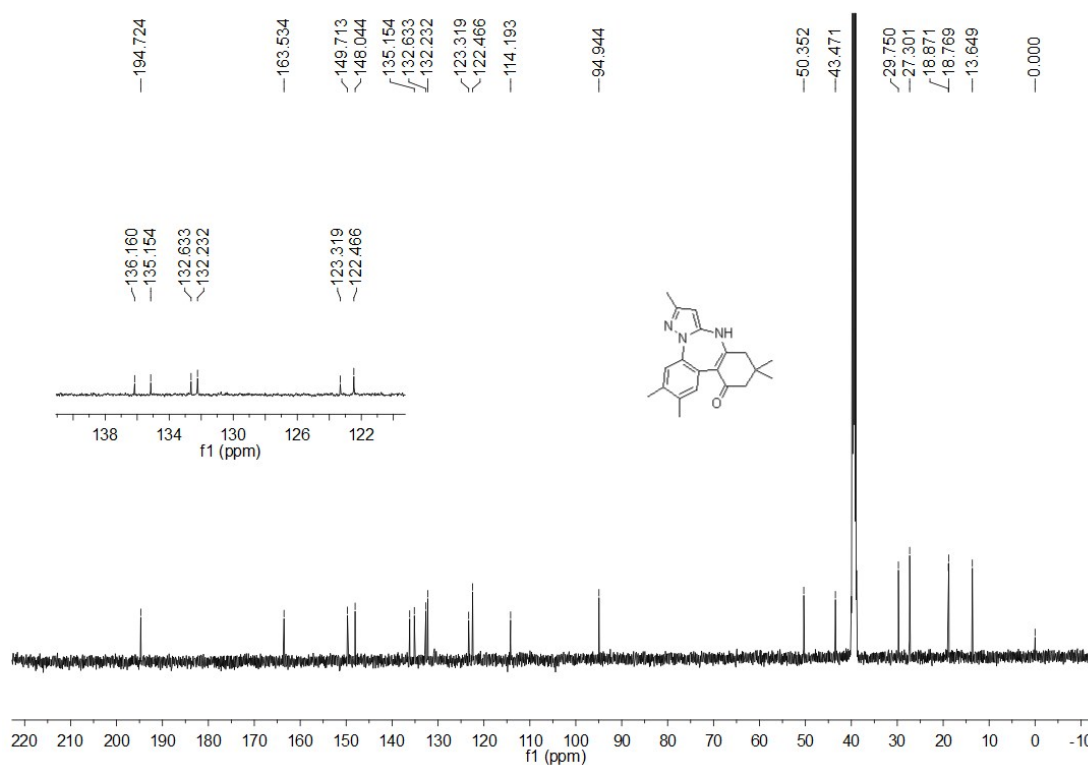

<sup>13</sup>C NMR Spectrum of Compound 3e

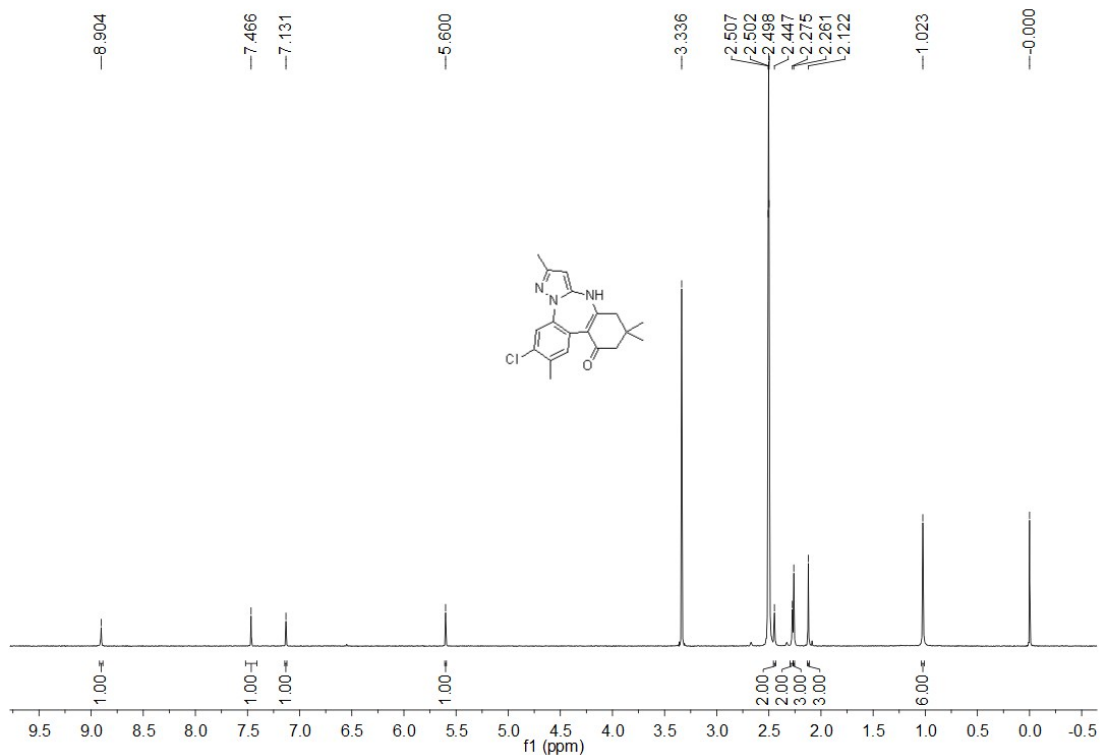

<sup>1</sup>H NMR Spectrum of Compound 3f

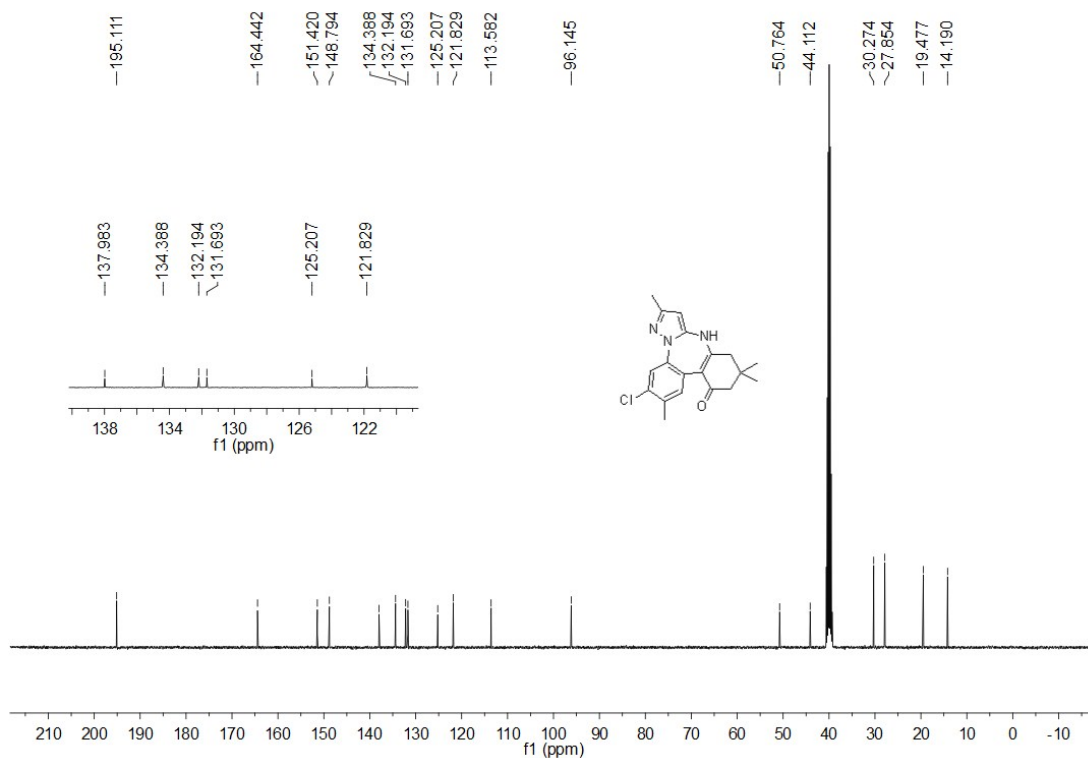

<sup>13</sup>C NMR Spectrum of Compound 3f

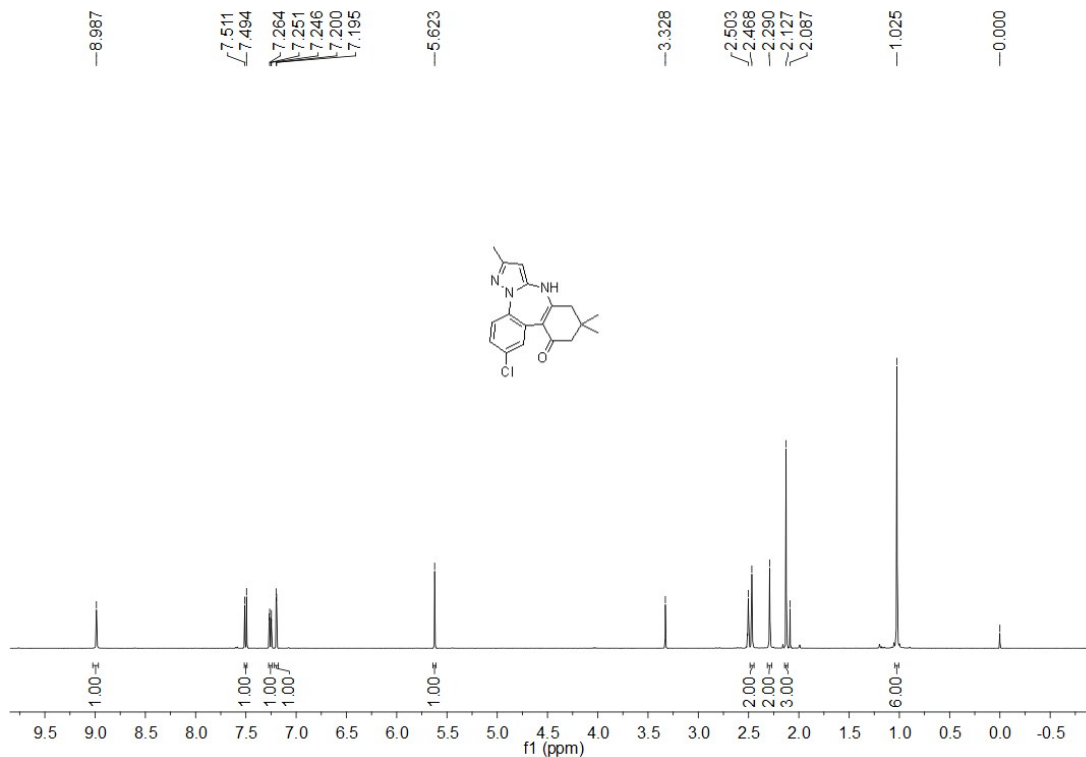

**<sup>1</sup>H NMR Spectrum of Compound 3g**

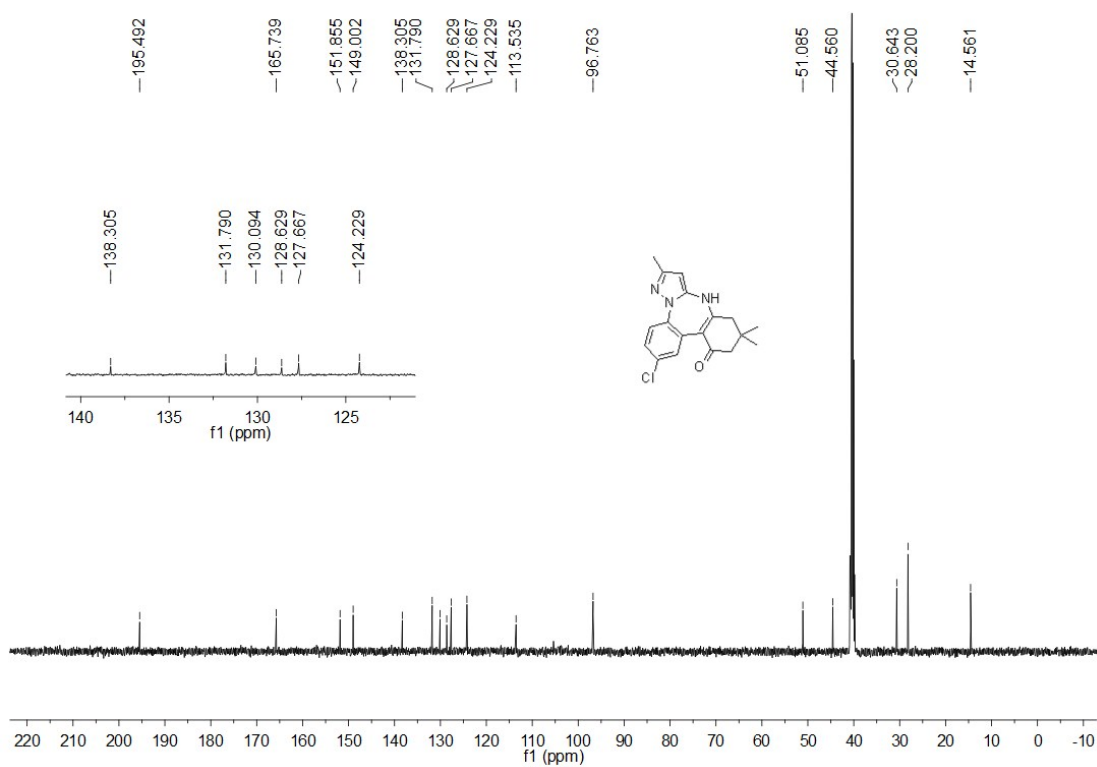

**<sup>13</sup>C NMR Spectrum of Compound 3g**



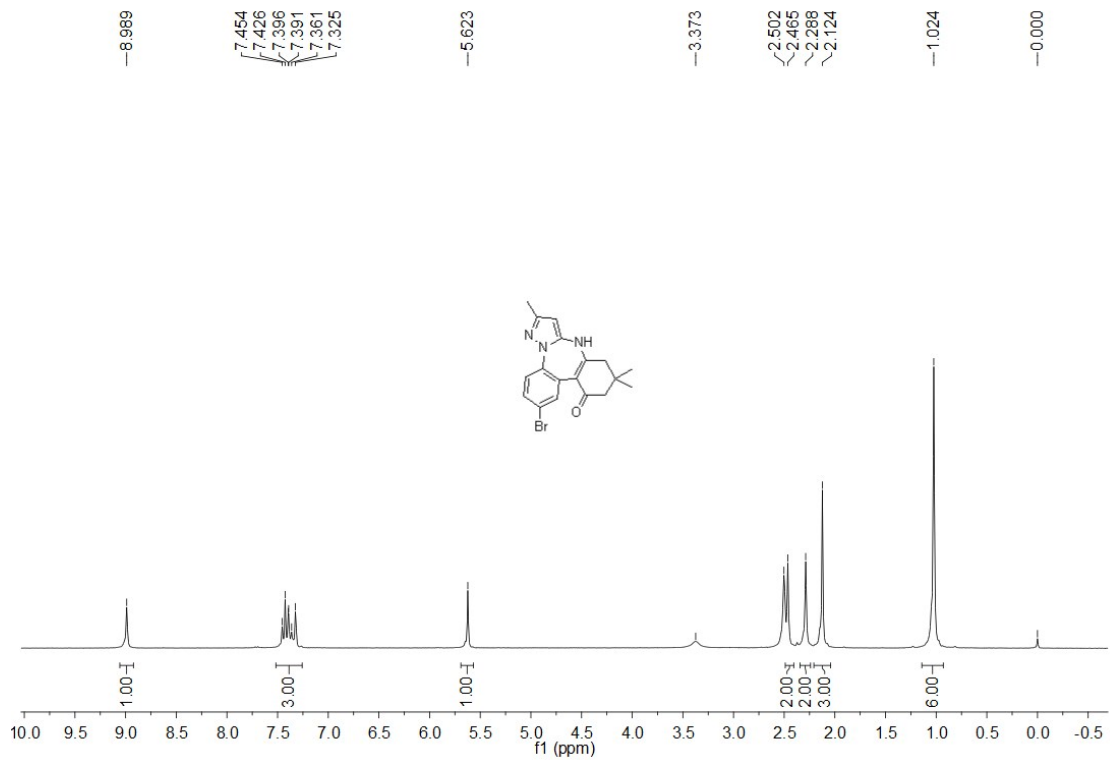

<sup>1</sup>H NMR Spectrum of Compound 3h

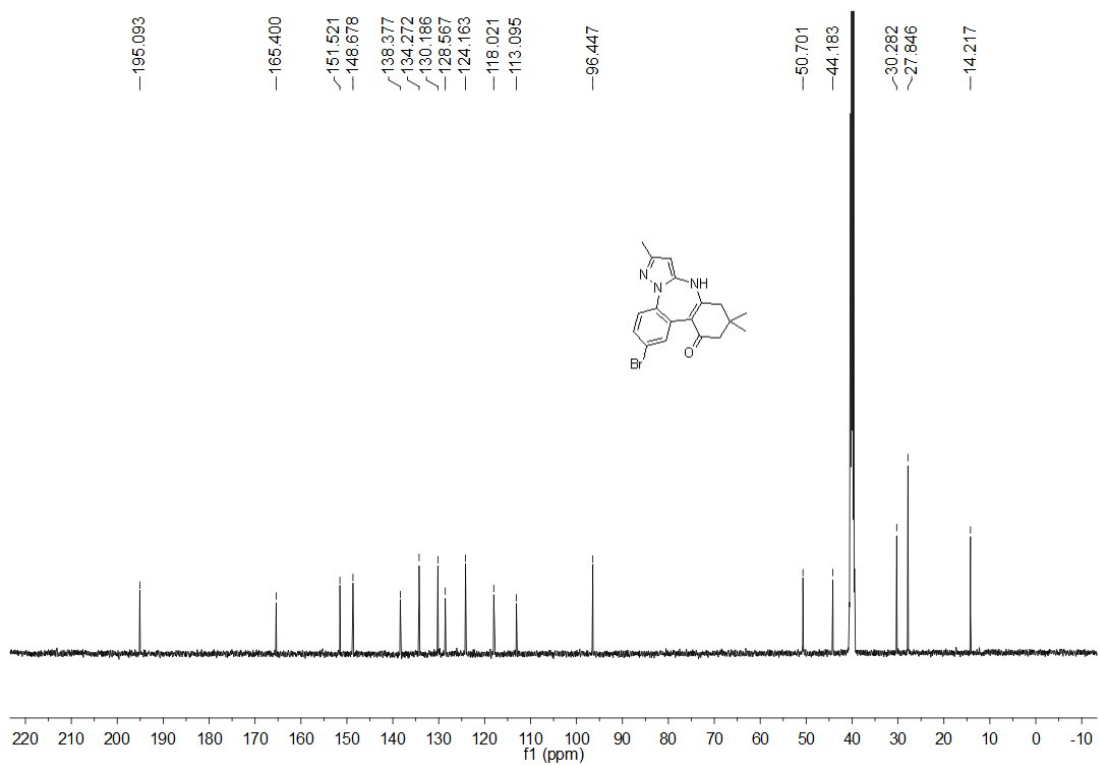

<sup>13</sup>C NMR Spectrum of Compound 3h

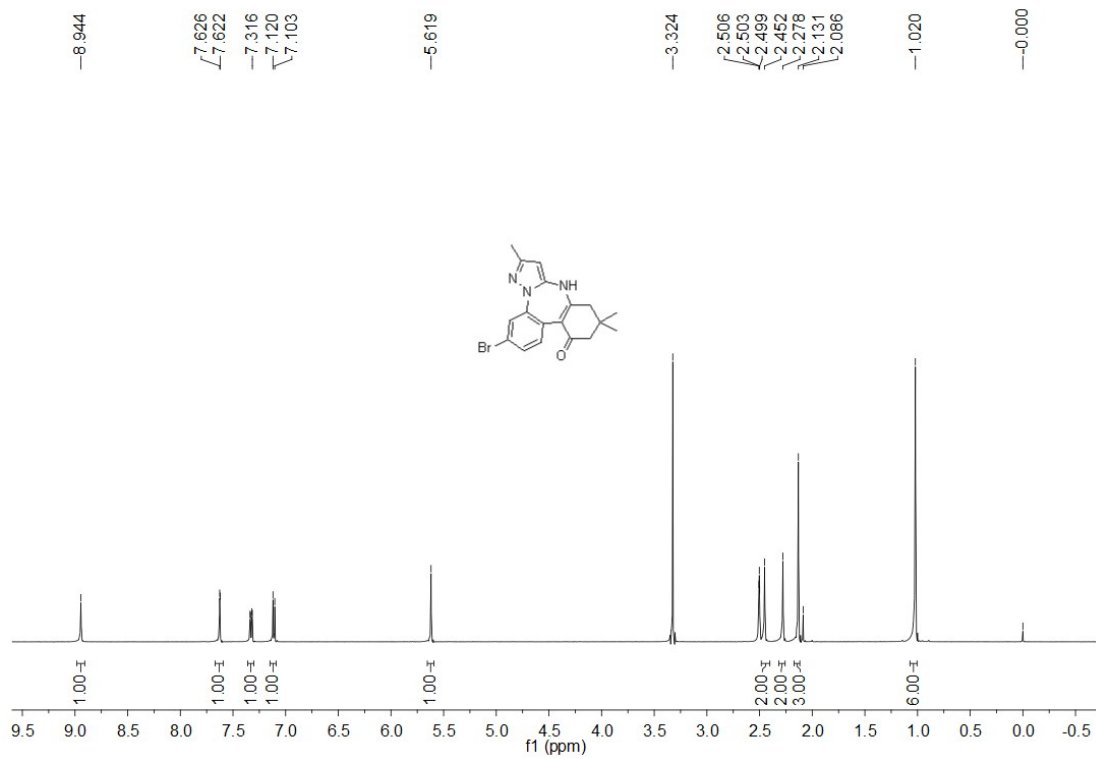

<sup>1</sup>H NMR Spectrum of Compound 3i

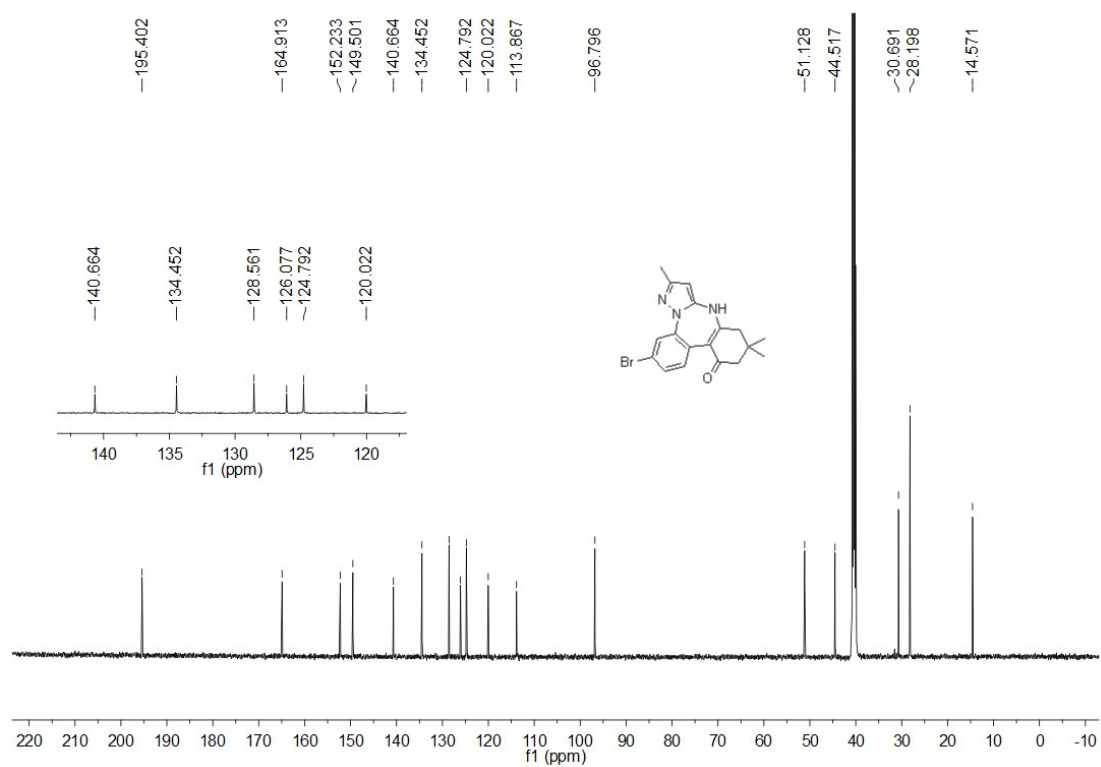

<sup>13</sup>C NMR Spectrum of Compound 3i

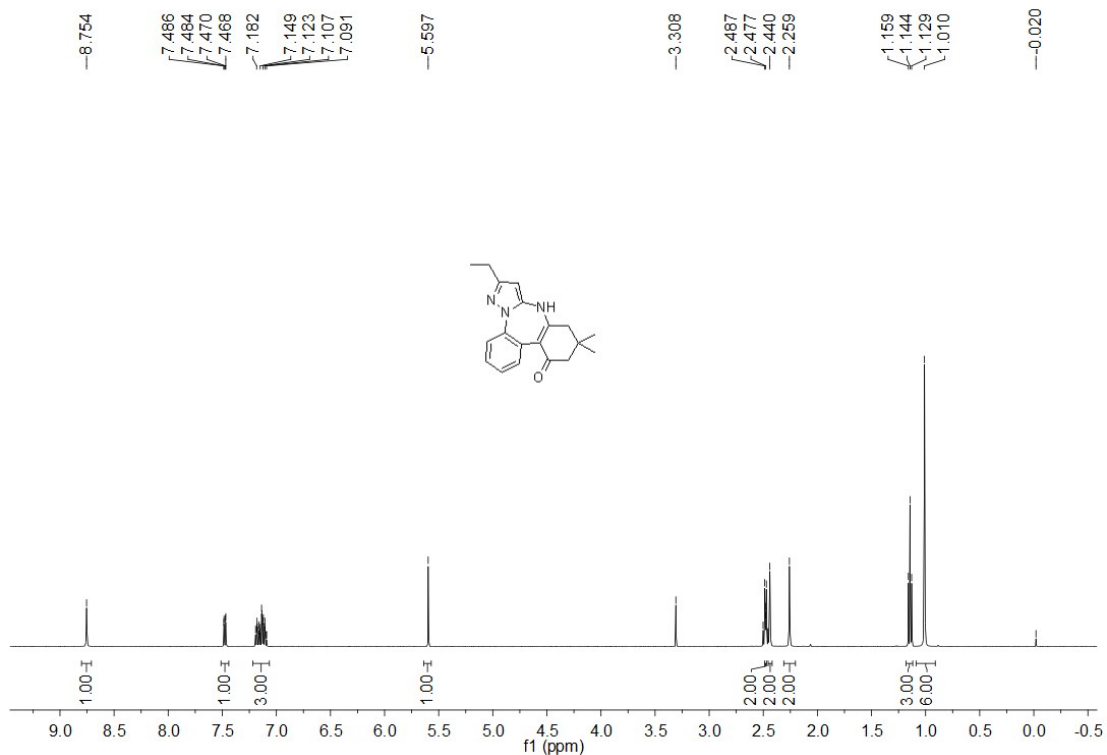

**<sup>1</sup>H NMR Spectrum of Compound 3j**

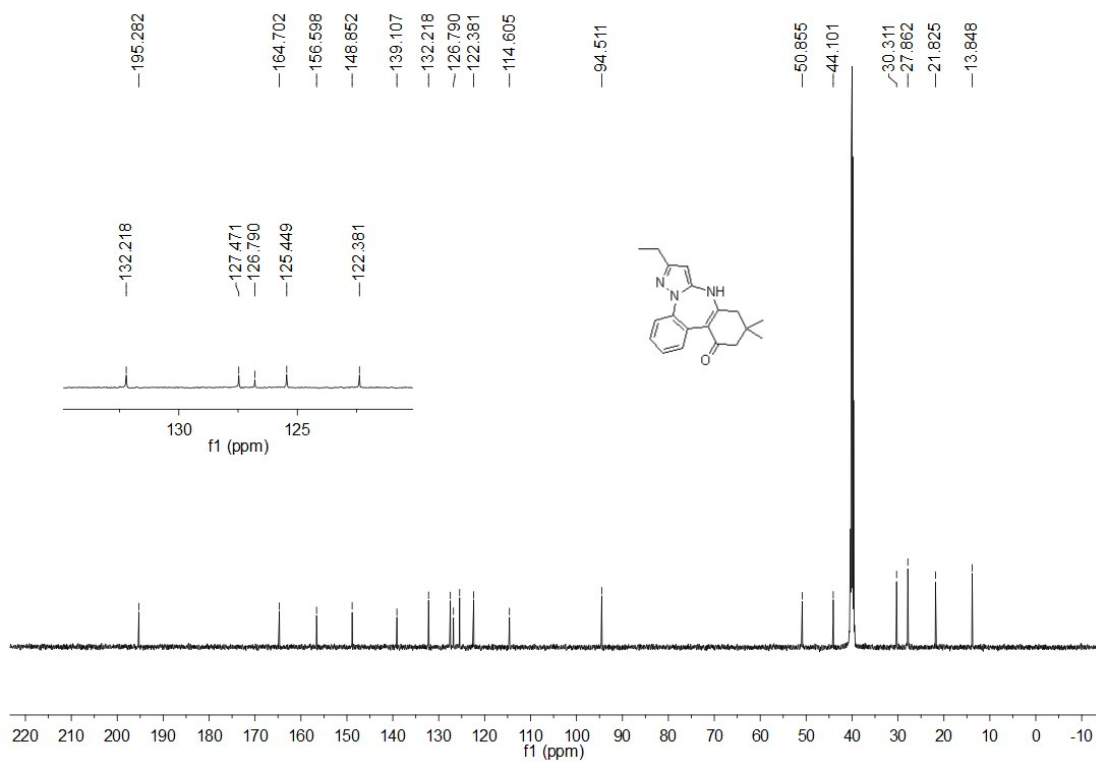

**<sup>13</sup>C NMR Spectrum of Compound 3j**

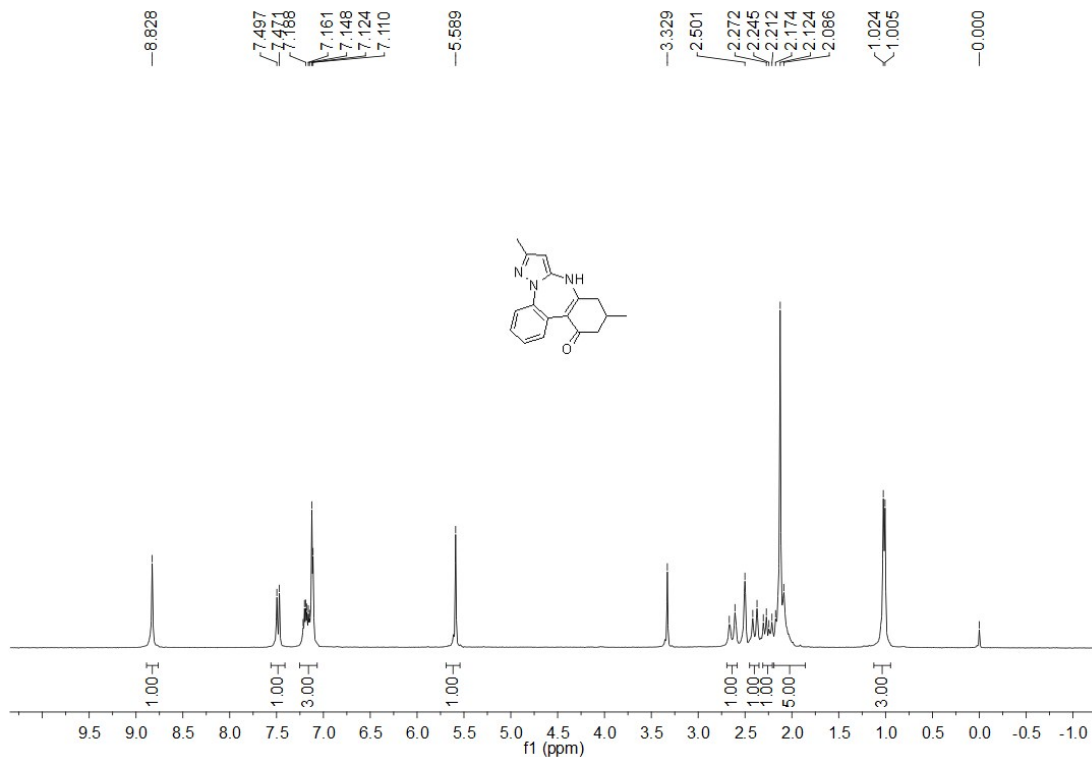

<sup>1</sup>H NMR Spectrum of Compound 3n

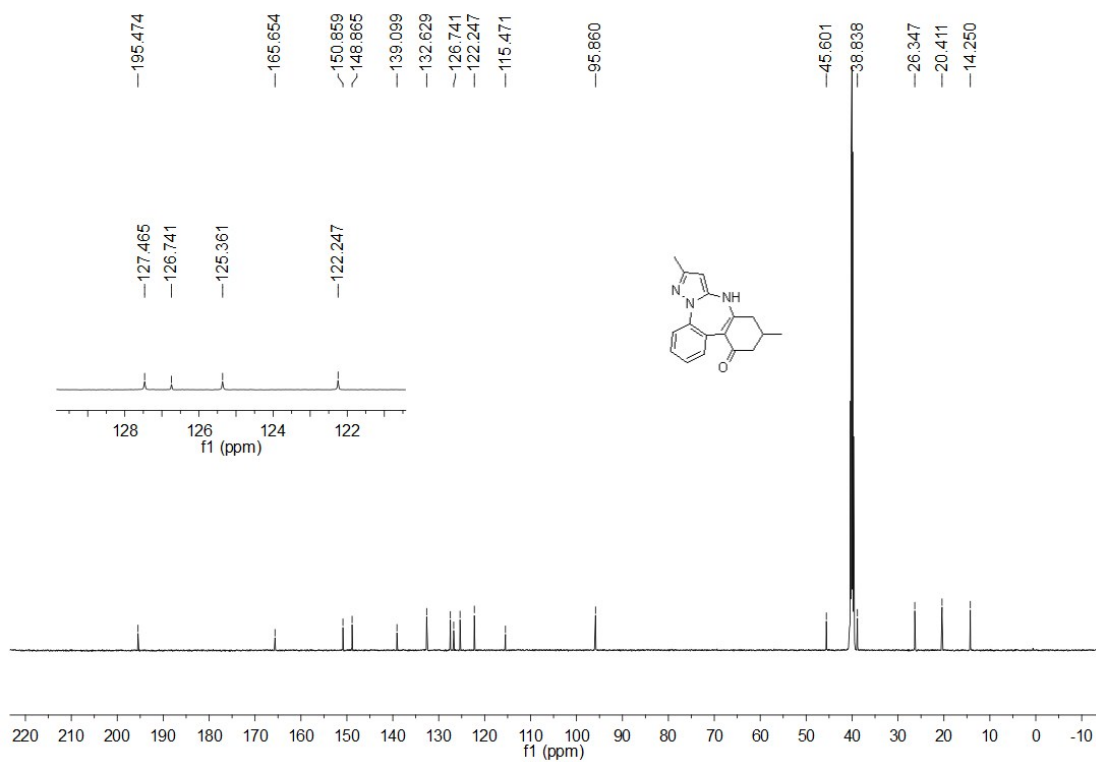

<sup>13</sup>C NMR Spectrum of Compound 3n

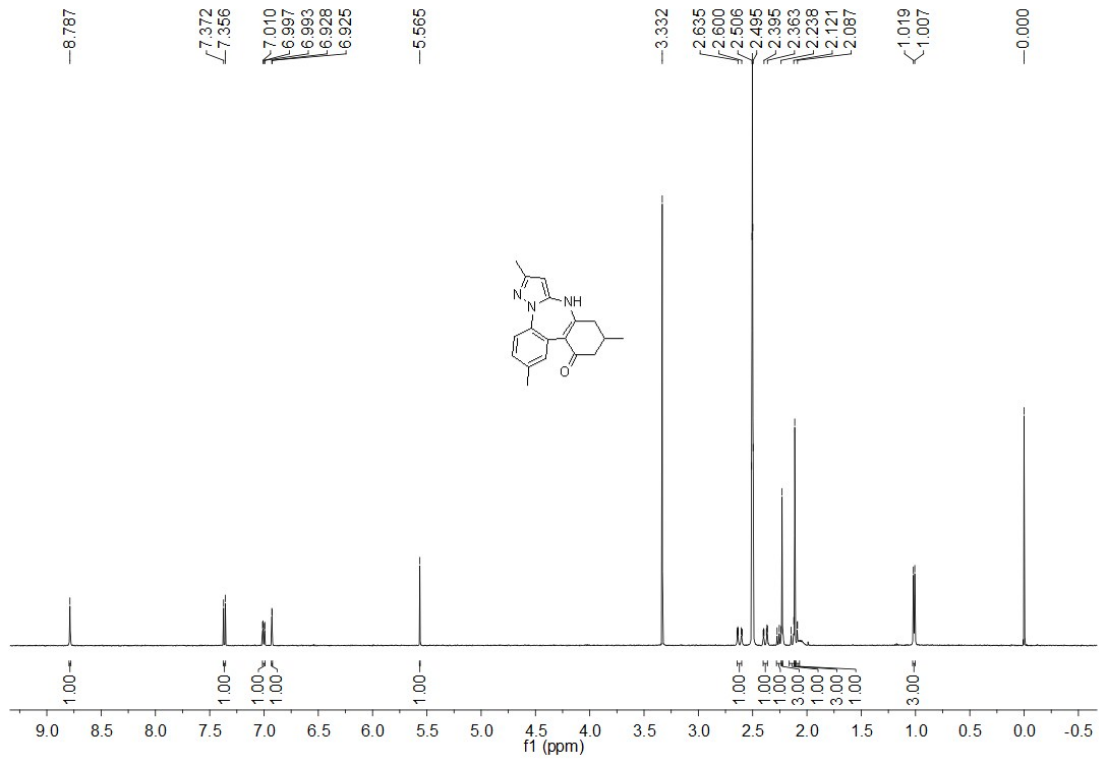

<sup>1</sup>H NMR Spectrum of Compound 3o

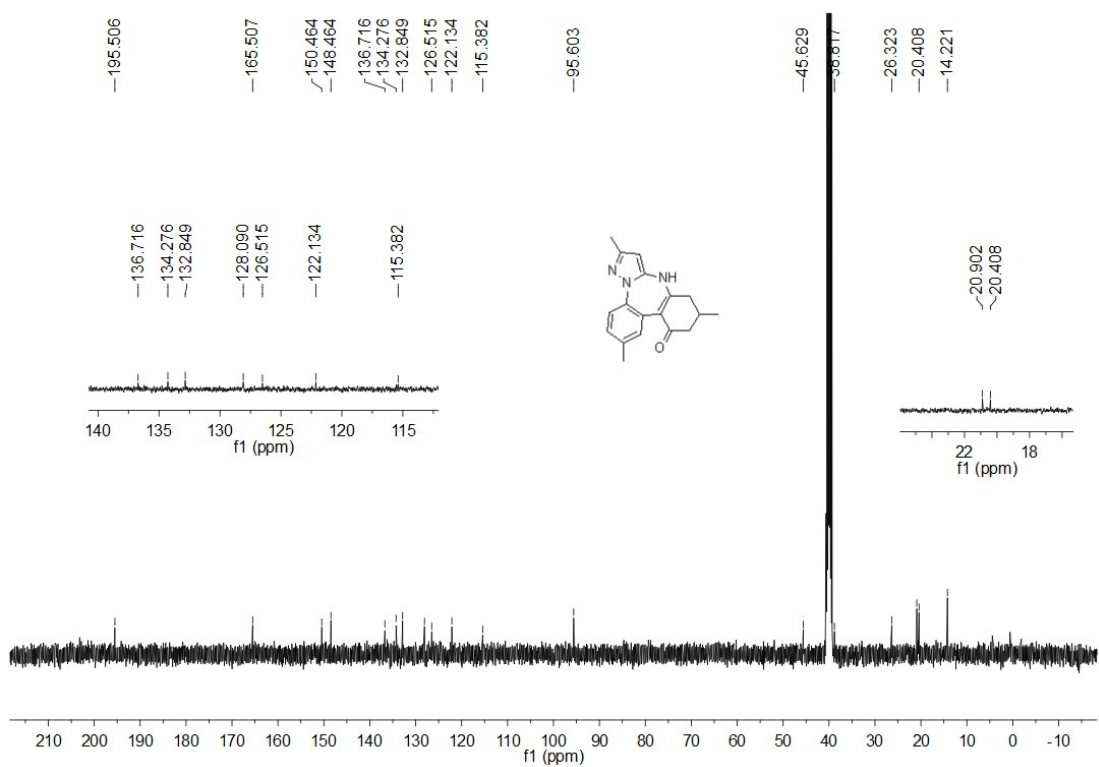

<sup>13</sup>C NMR Spectrum of Compound 3o

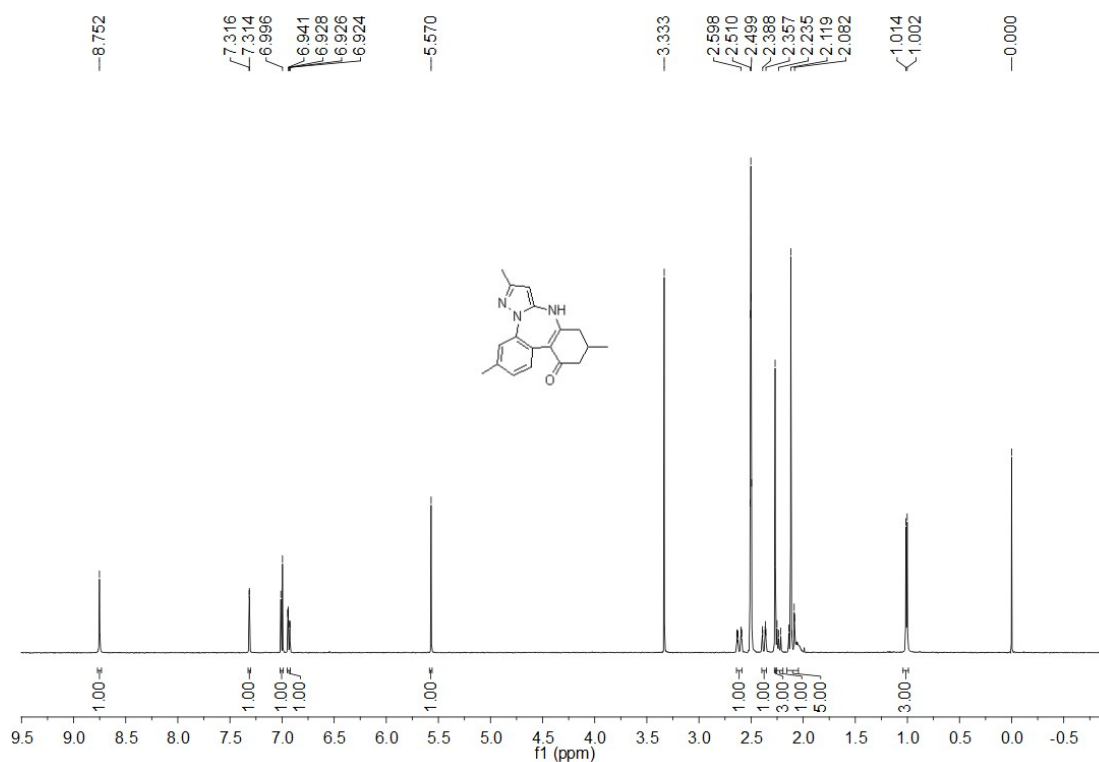

<sup>1</sup>H NMR Spectrum of Compound 3p

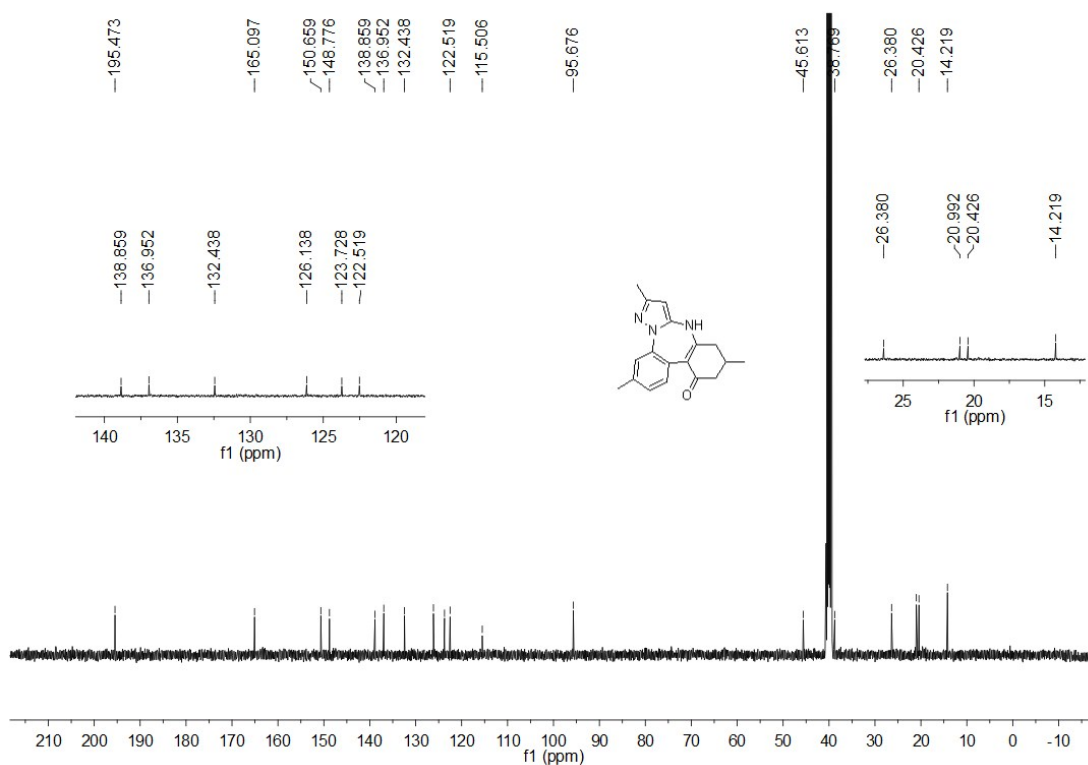

<sup>13</sup>C NMR Spectrum of Compound 3p

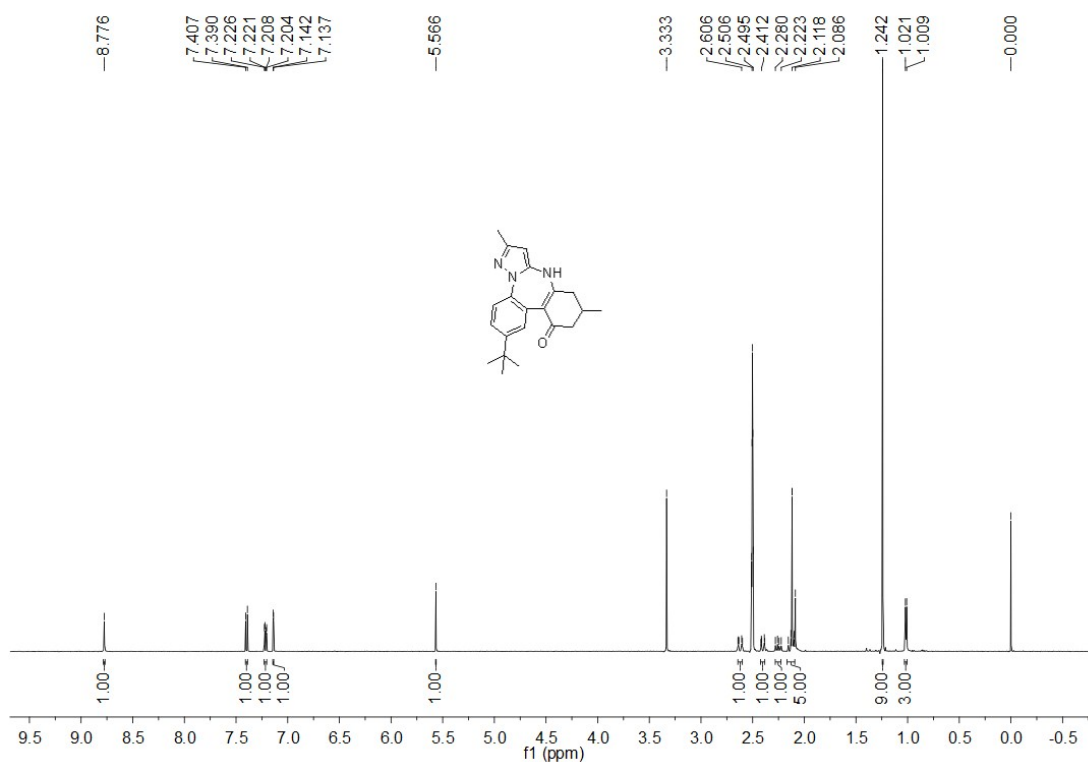

**<sup>1</sup>H NMR Spectrum of Compound 3q**

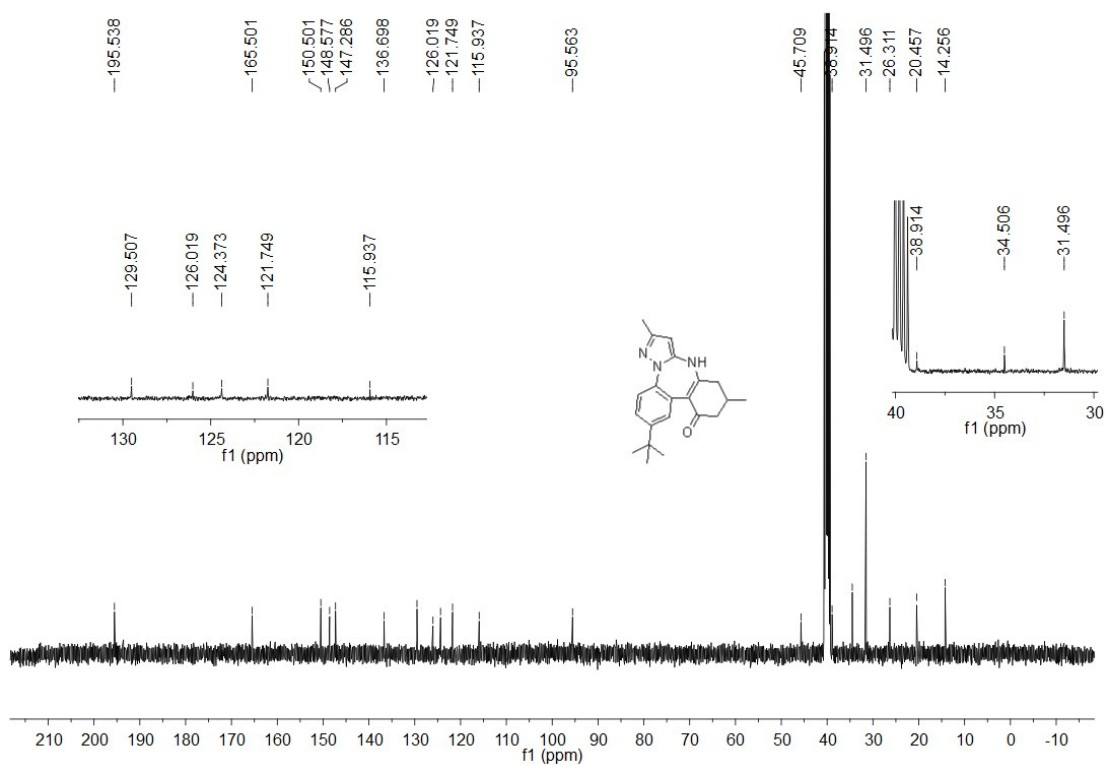

**<sup>13</sup>C NMR Spectrum of Compound 3q**

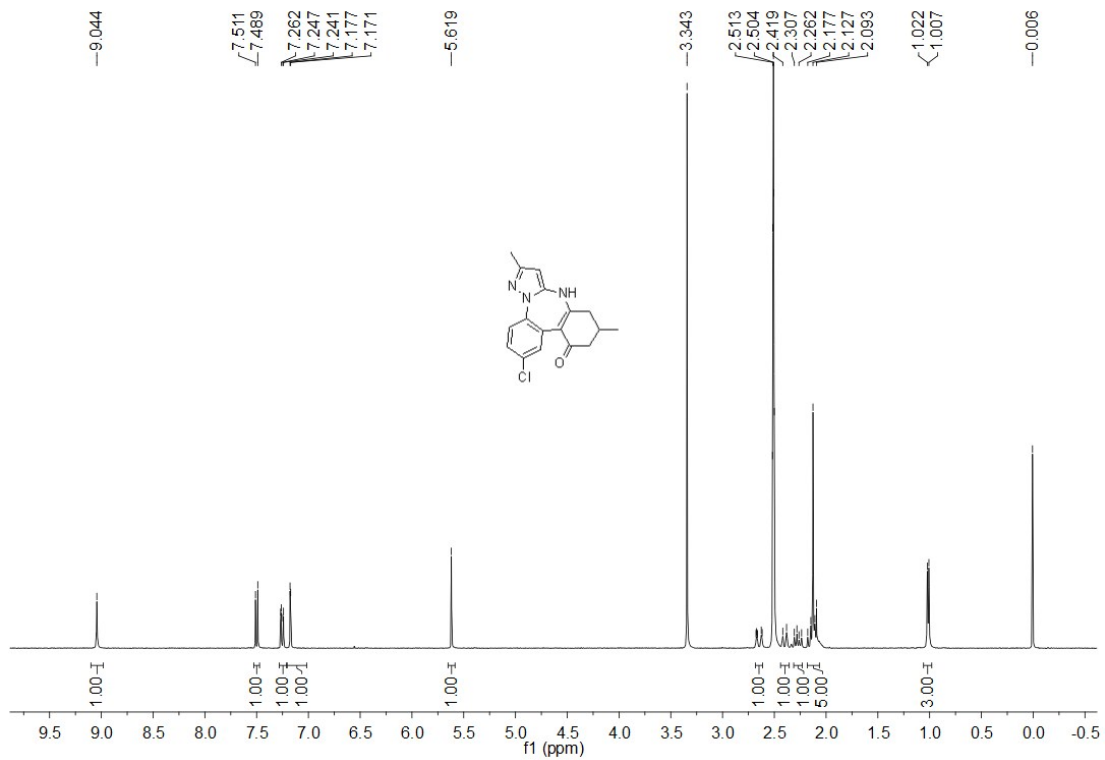

<sup>1</sup>H NMR Spectrum of Compound 3r

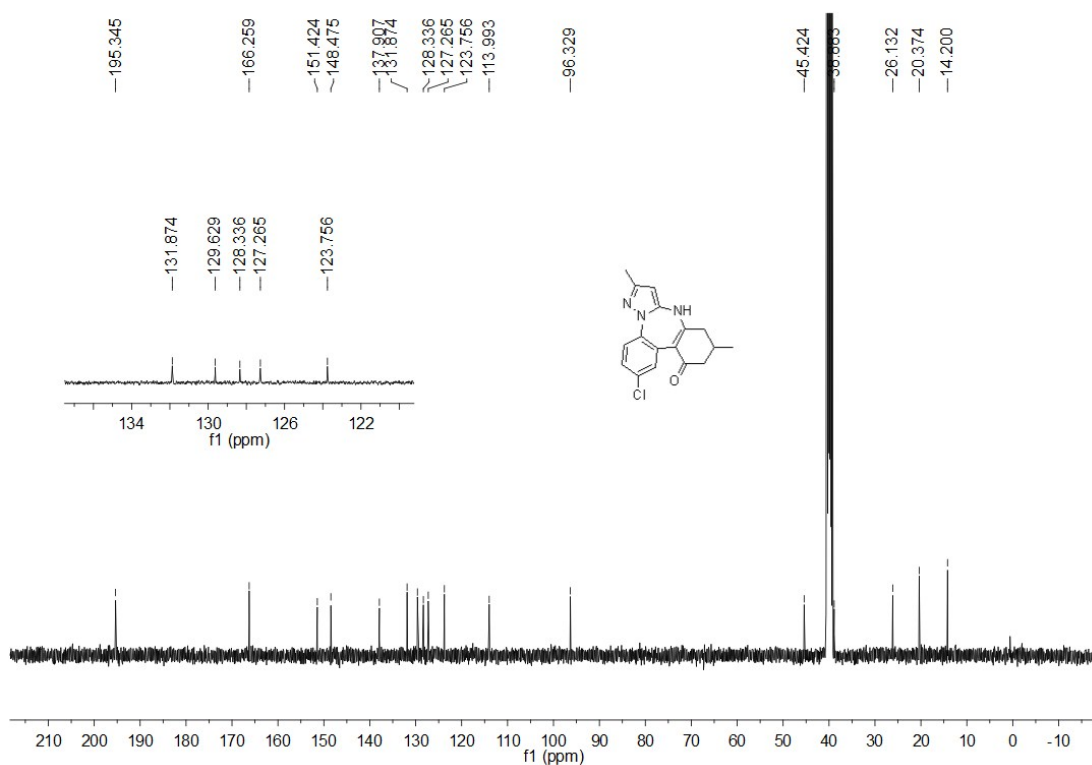

<sup>13</sup>C NMR Spectrum of Compound 3r



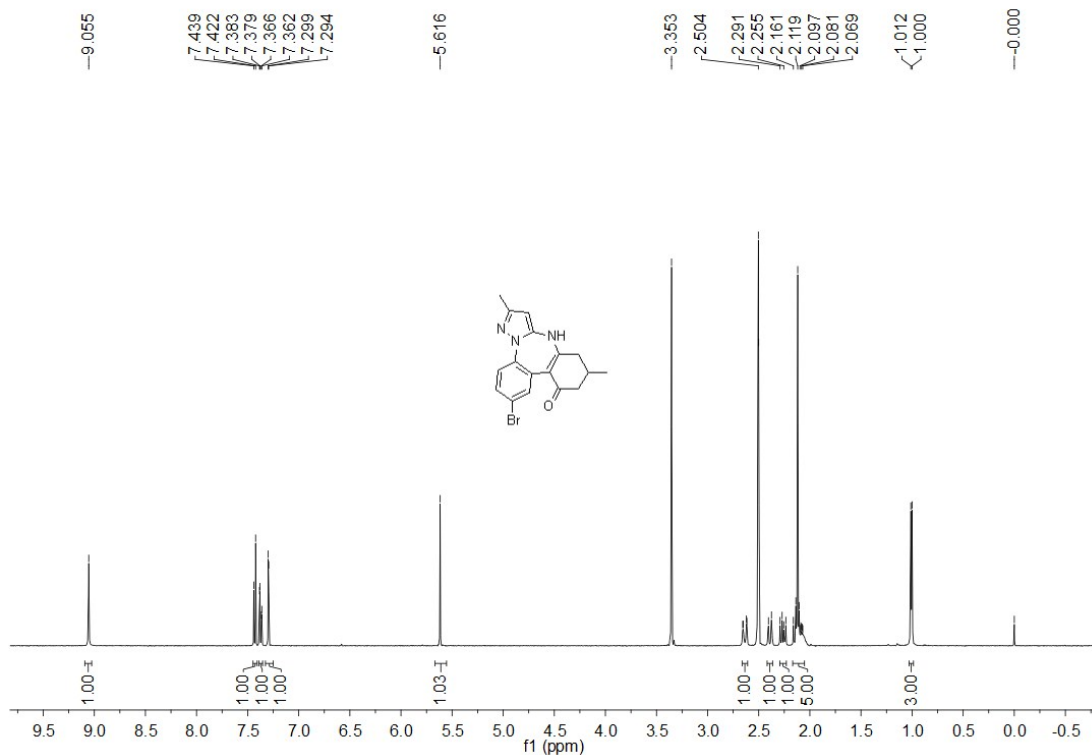

<sup>1</sup>H NMR Spectrum of Compound 3s

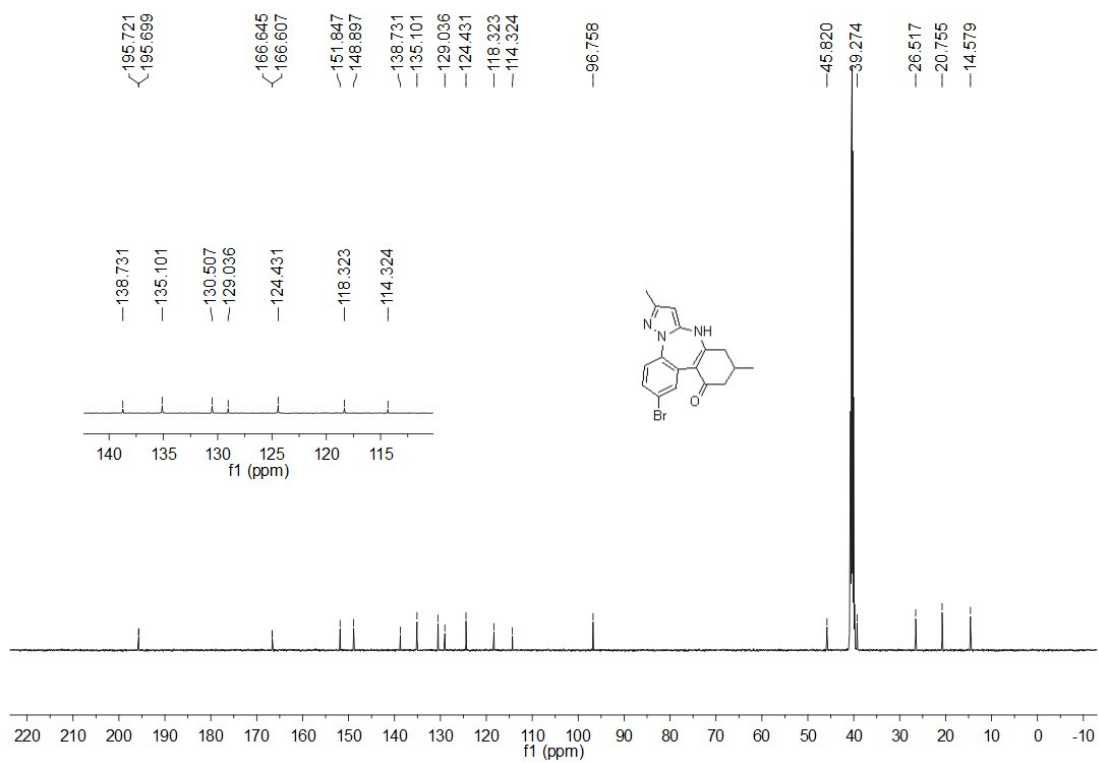

<sup>13</sup>C NMR Spectrum of Compound 3s

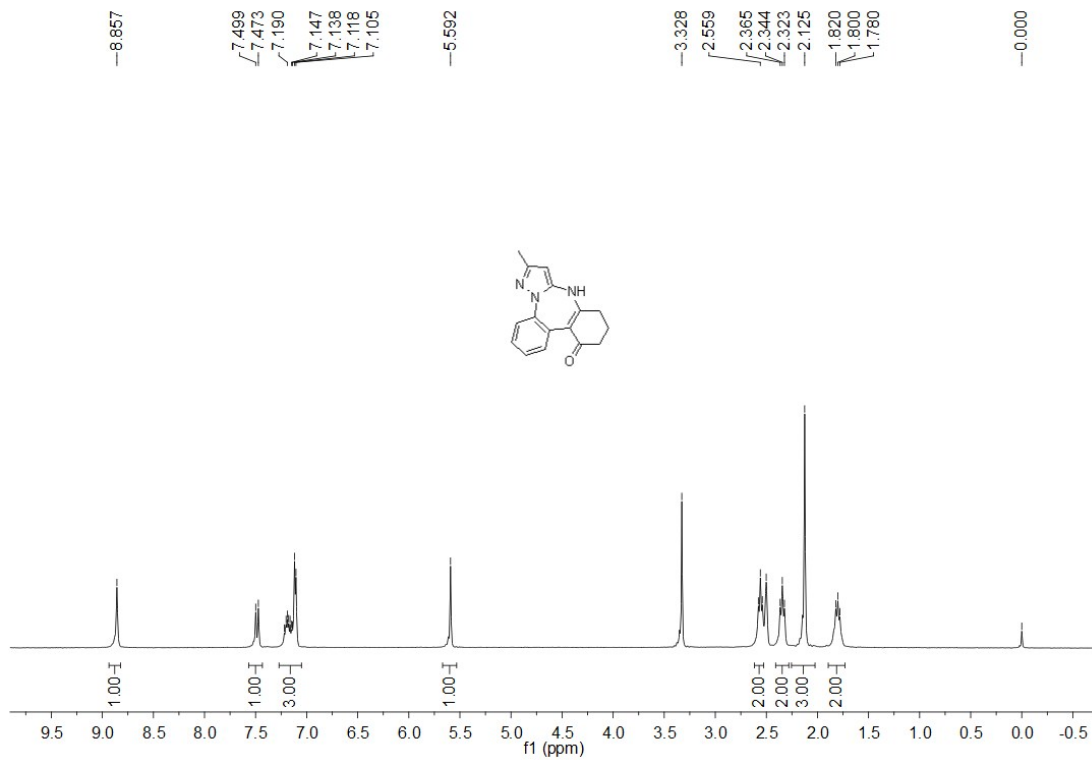

<sup>1</sup>H NMR Spectrum of Compound 3t

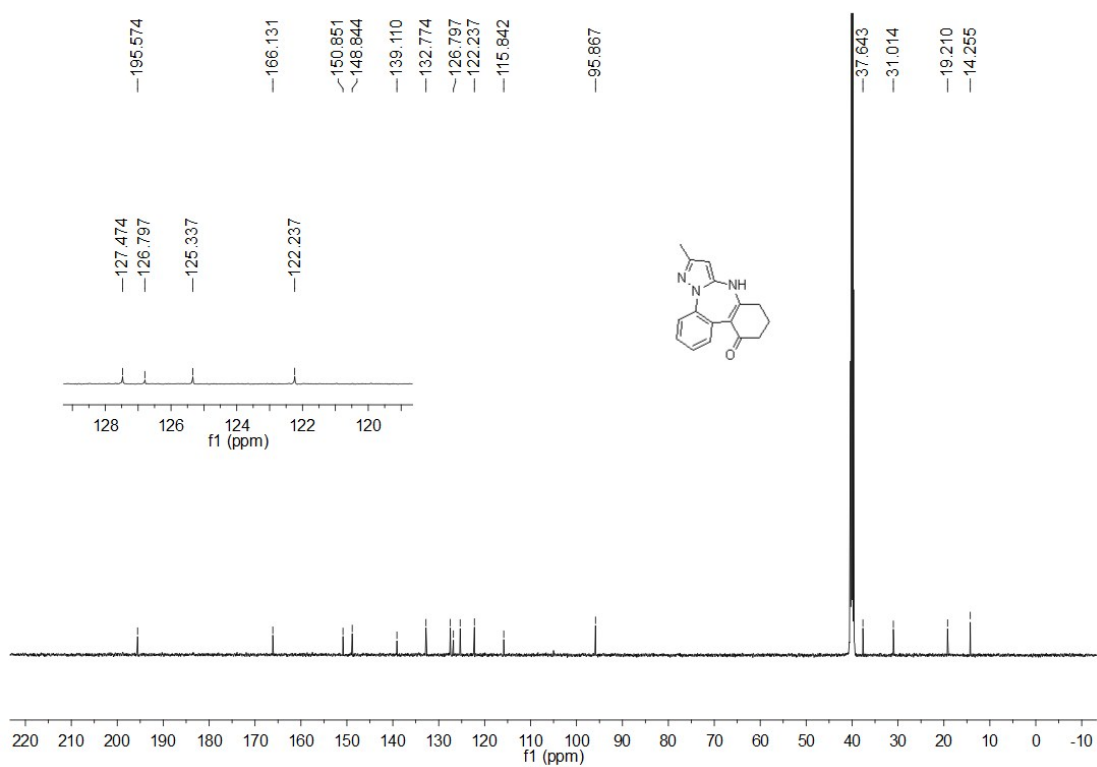

<sup>13</sup>C NMR Spectrum of Compound 3t

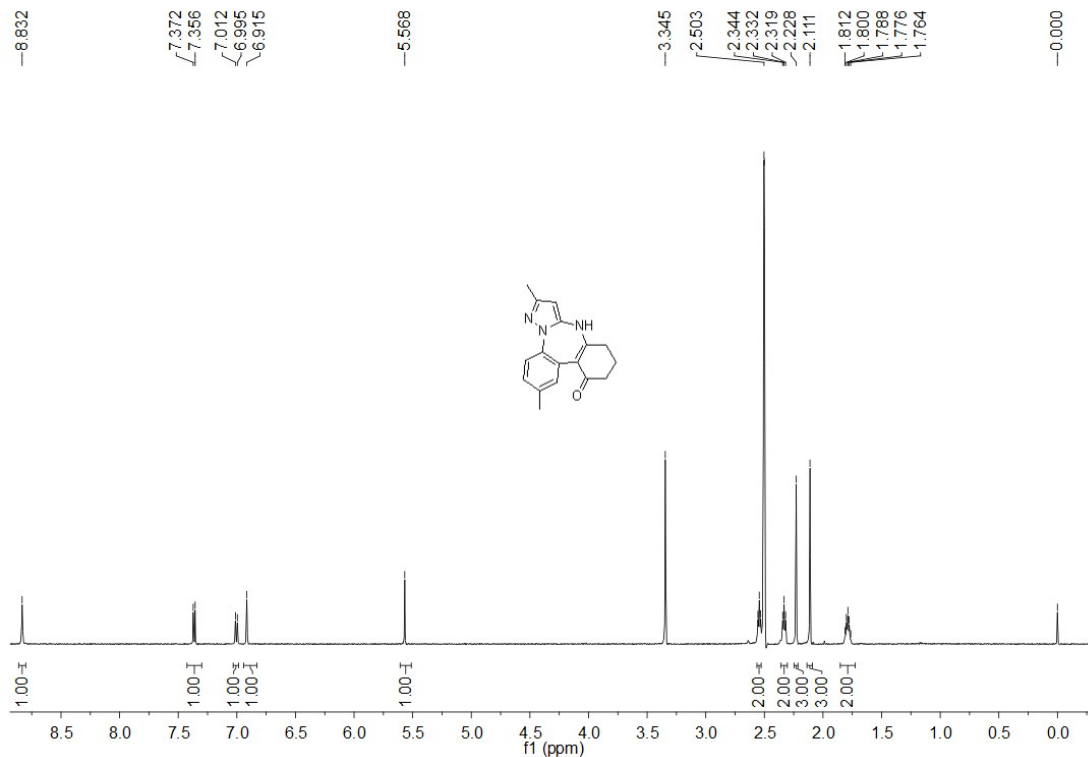

<sup>1</sup>H NMR Spectrum of Compound 3u

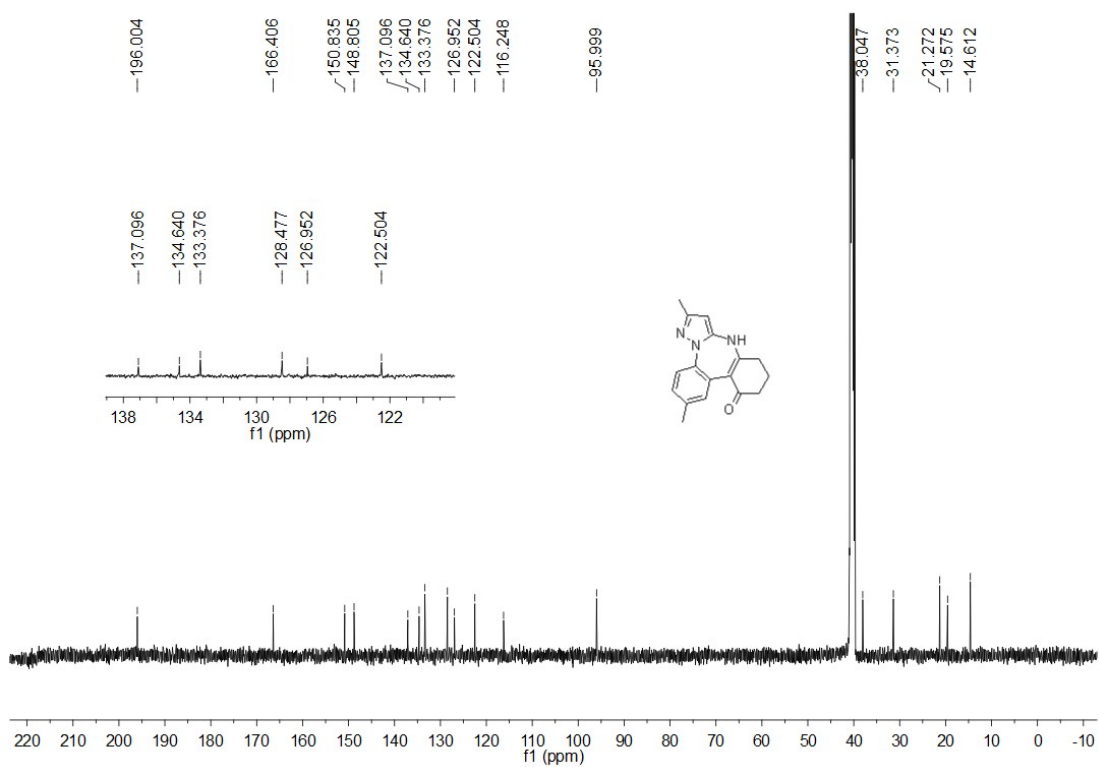

<sup>13</sup>C NMR Spectrum of Compound 3u

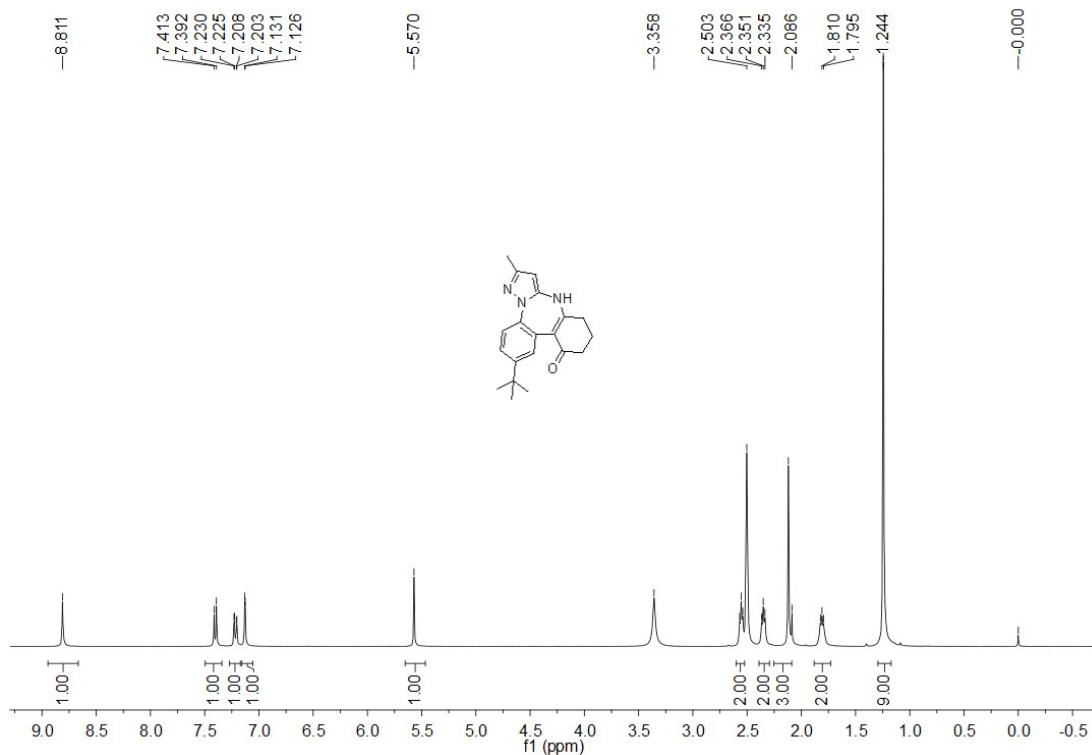

<sup>1</sup>H NMR Spectrum of Compound 3v

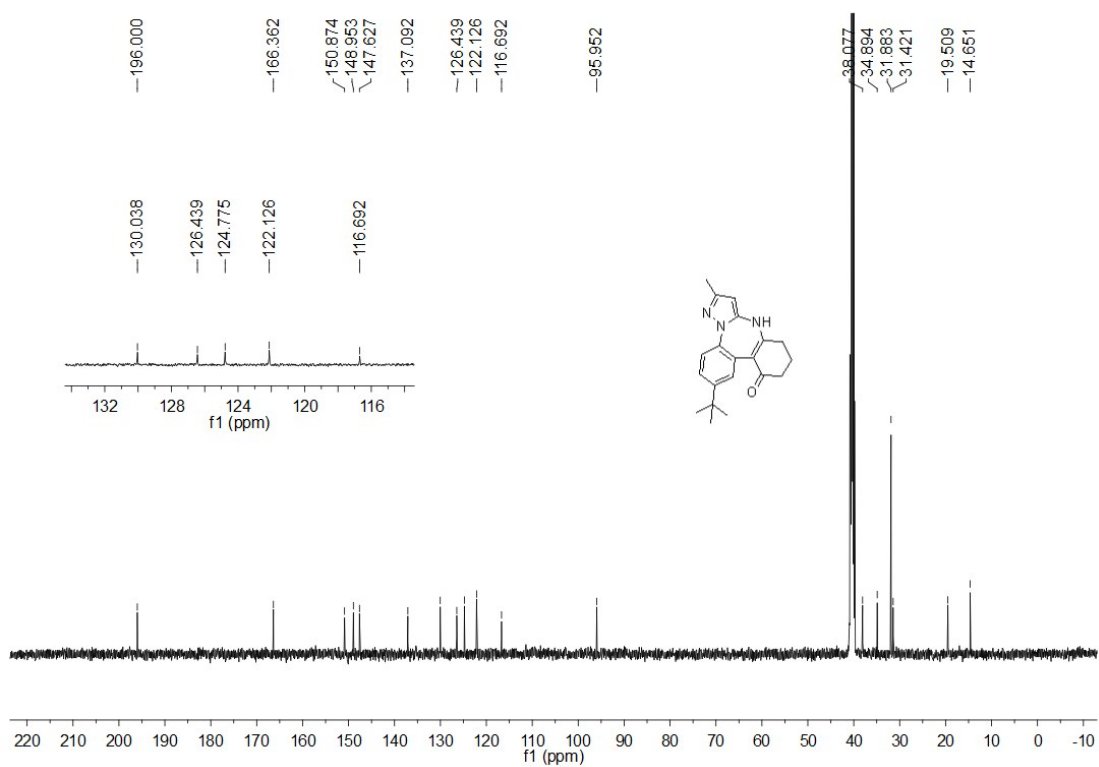

<sup>13</sup>C NMR Spectrum of Compound 3v

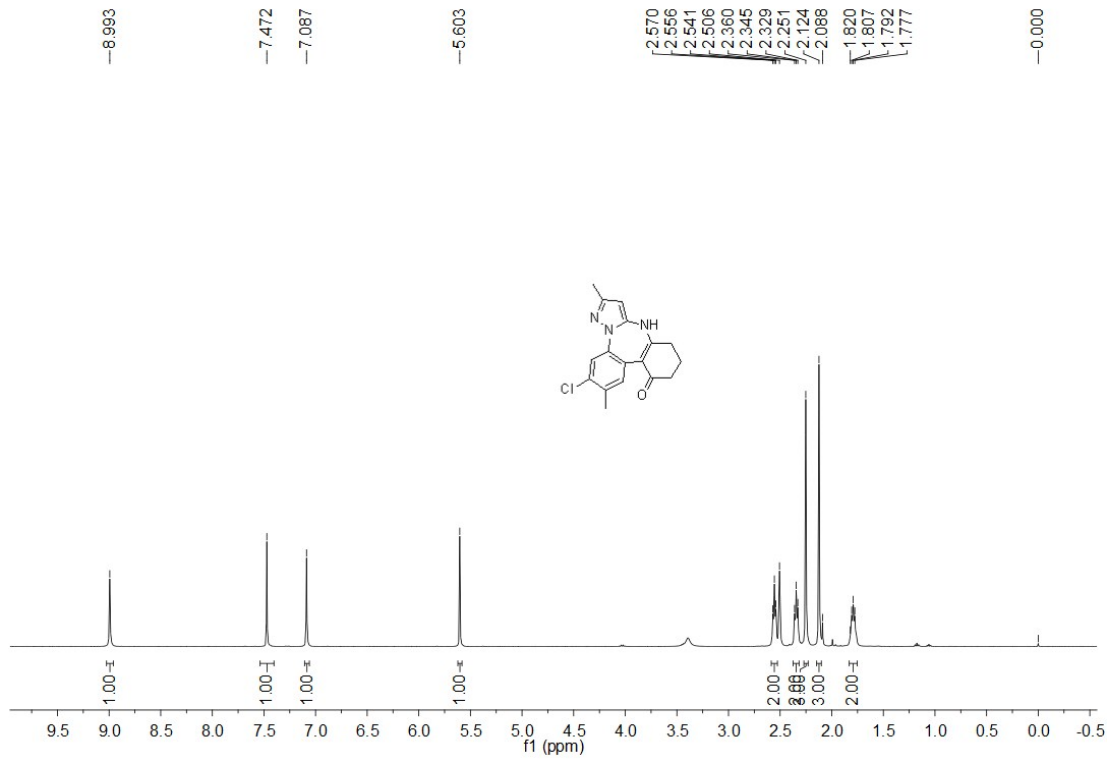

<sup>1</sup>H NMR Spectrum of Compound 3w

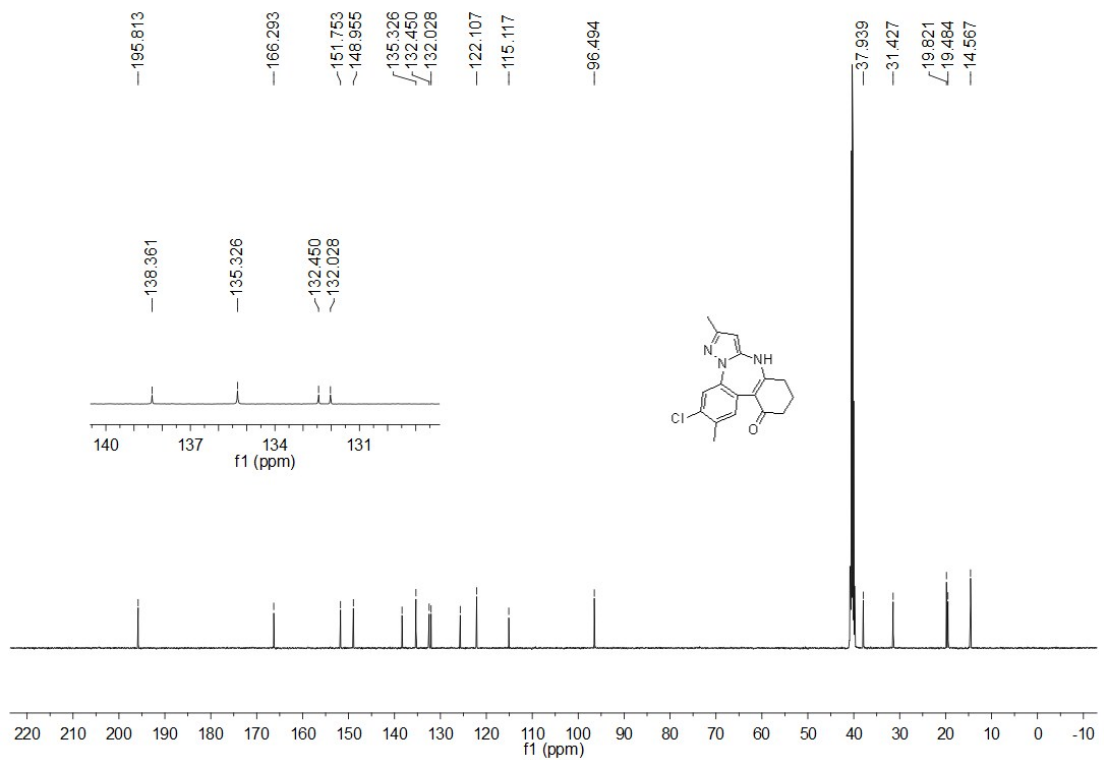

<sup>13</sup>C NMR Spectrum of Compound 3w

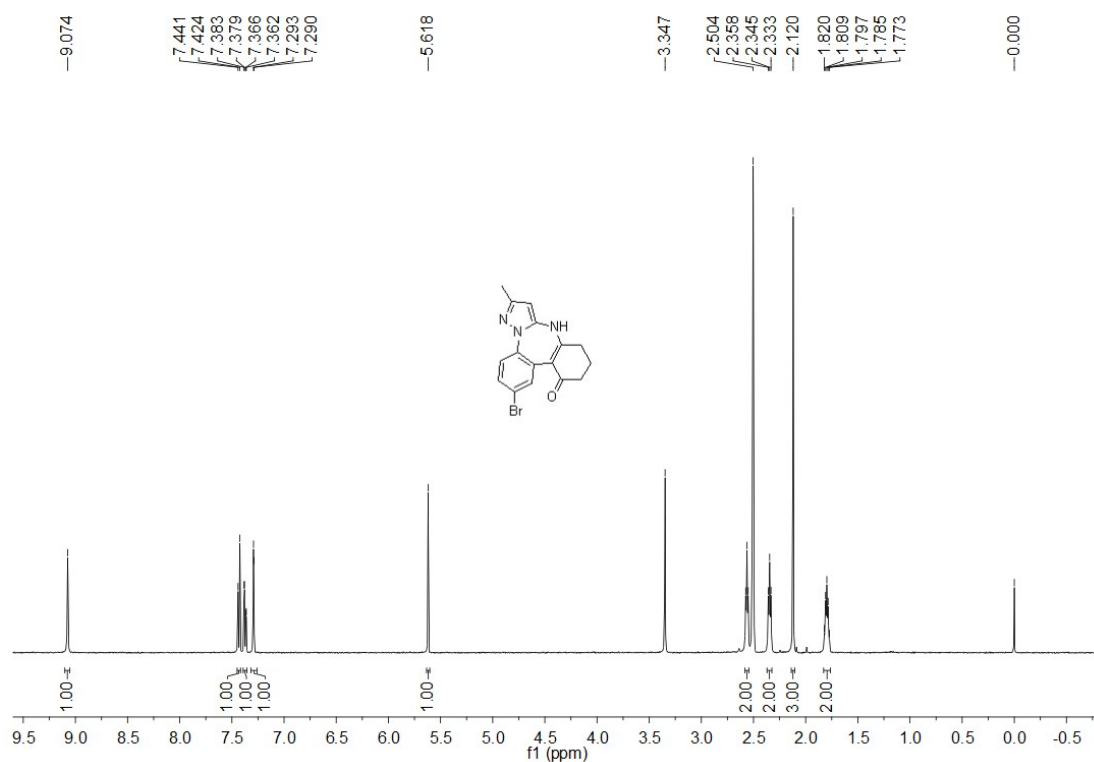

<sup>1</sup>H NMR Spectrum of Compound 3x

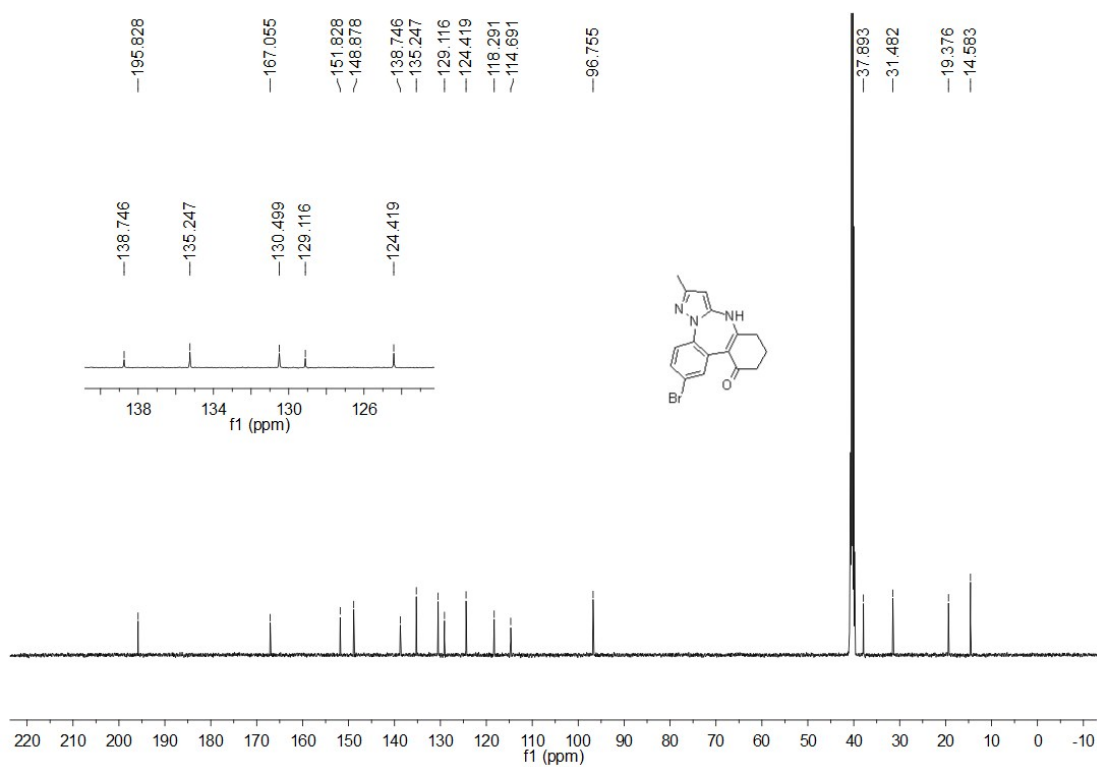

<sup>13</sup>C NMR Spectrum of Compound 3x

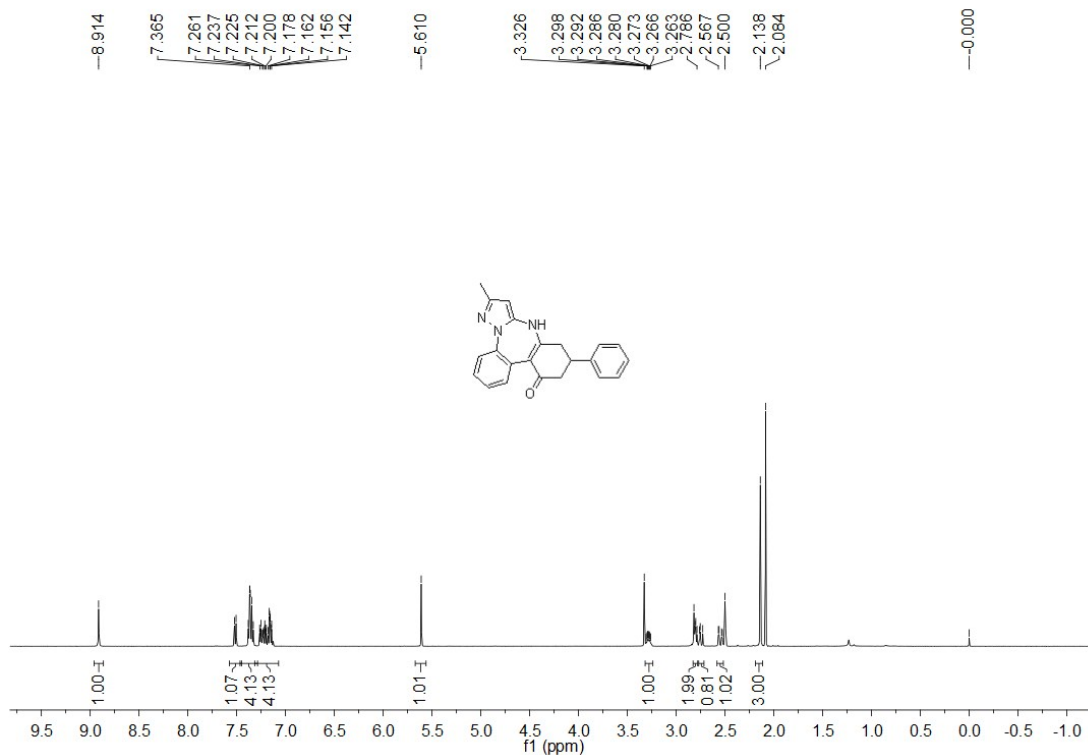

<sup>1</sup>H NMR Spectrum of Compound 3y

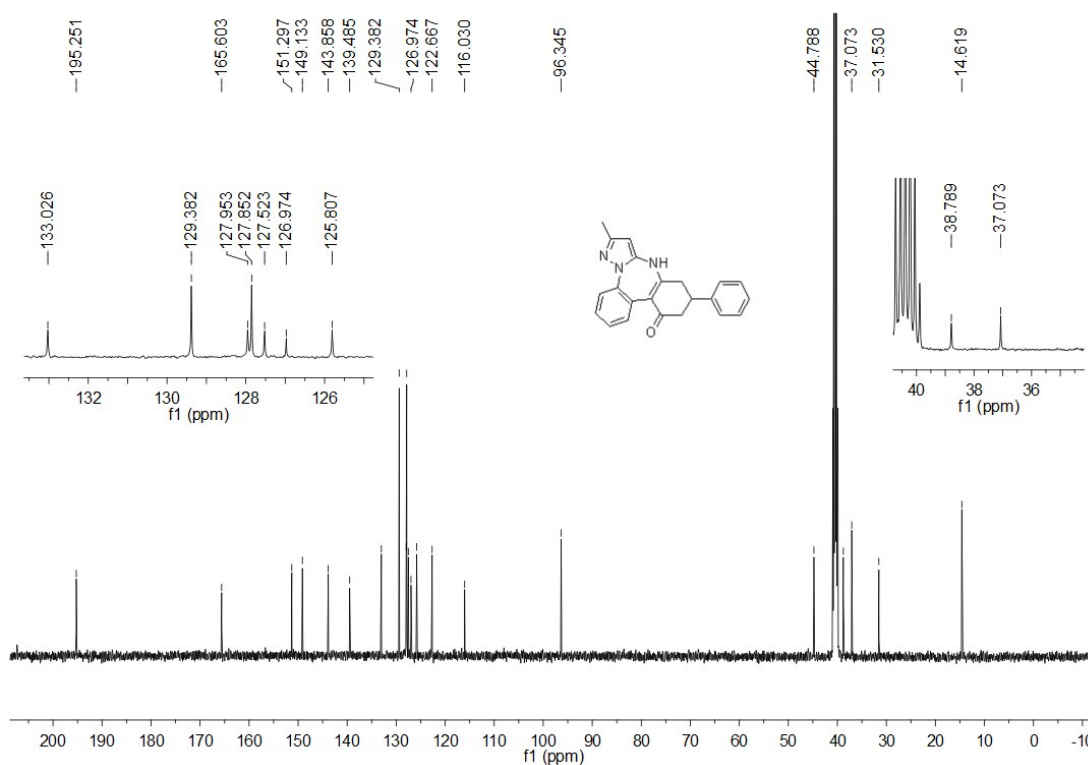

<sup>13</sup>C NMR Spectrum of Compound 3y

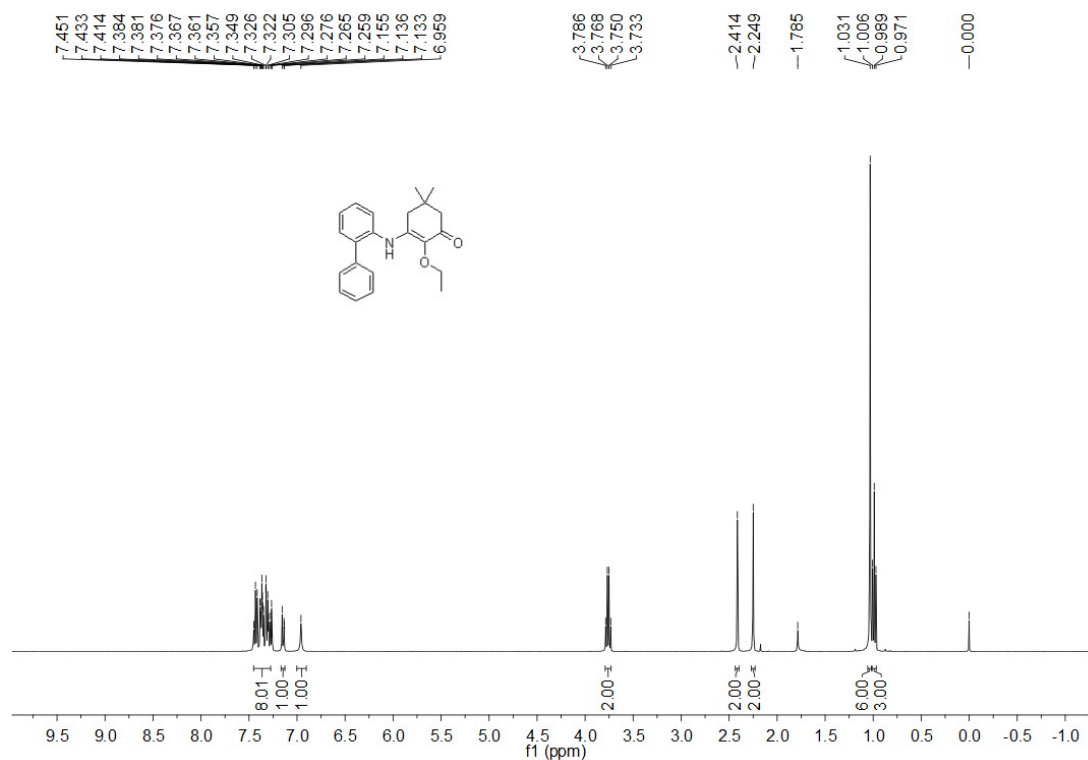

<sup>1</sup>H NMR Spectrum of Compound 5a

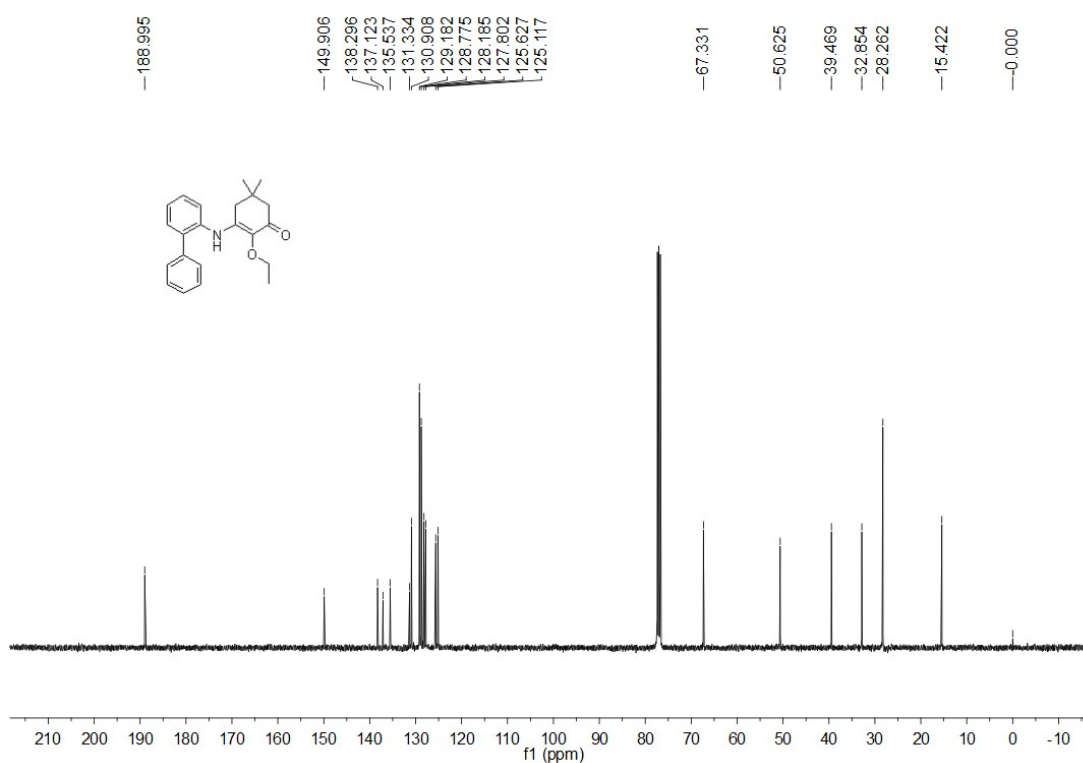

<sup>13</sup>C NMR Spectrum of Compound 5a



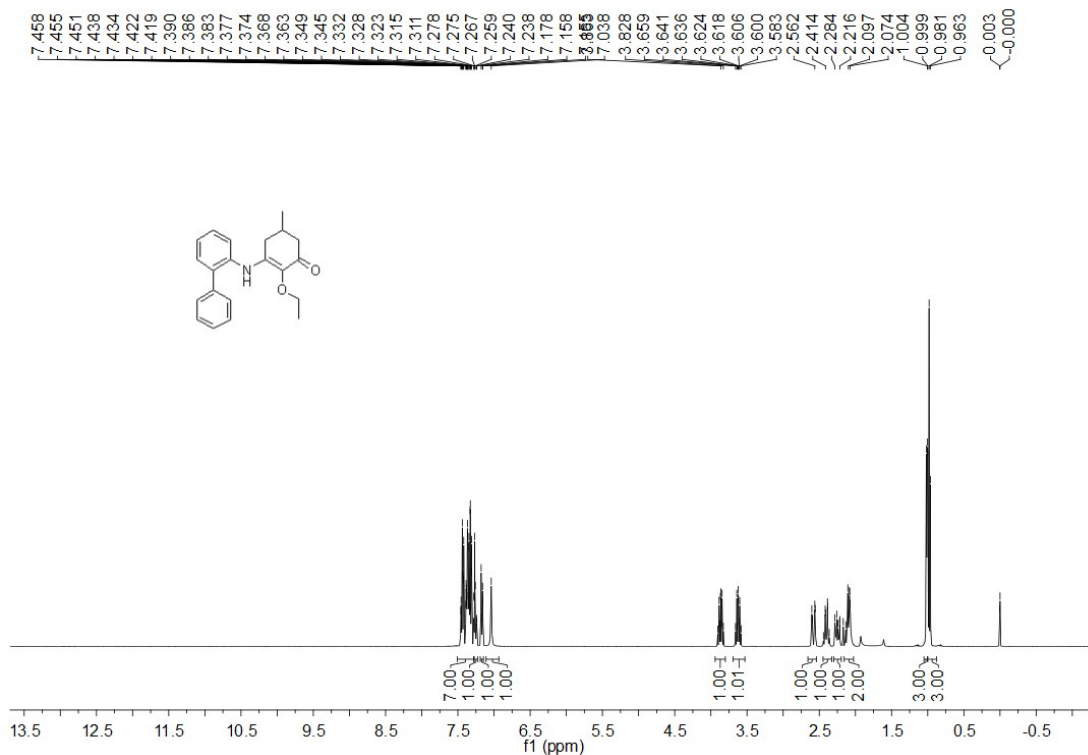

<sup>1</sup>H NMR Spectrum of Compound 5b

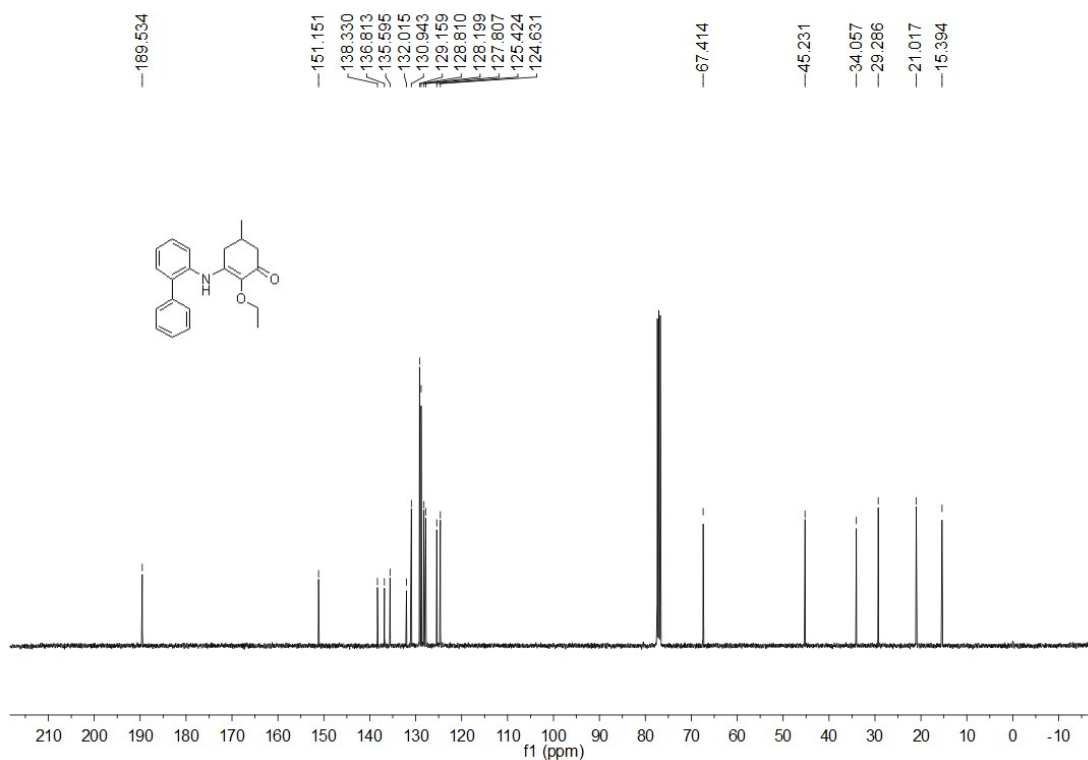

<sup>13</sup>C NMR Spectrum of Compound 5b

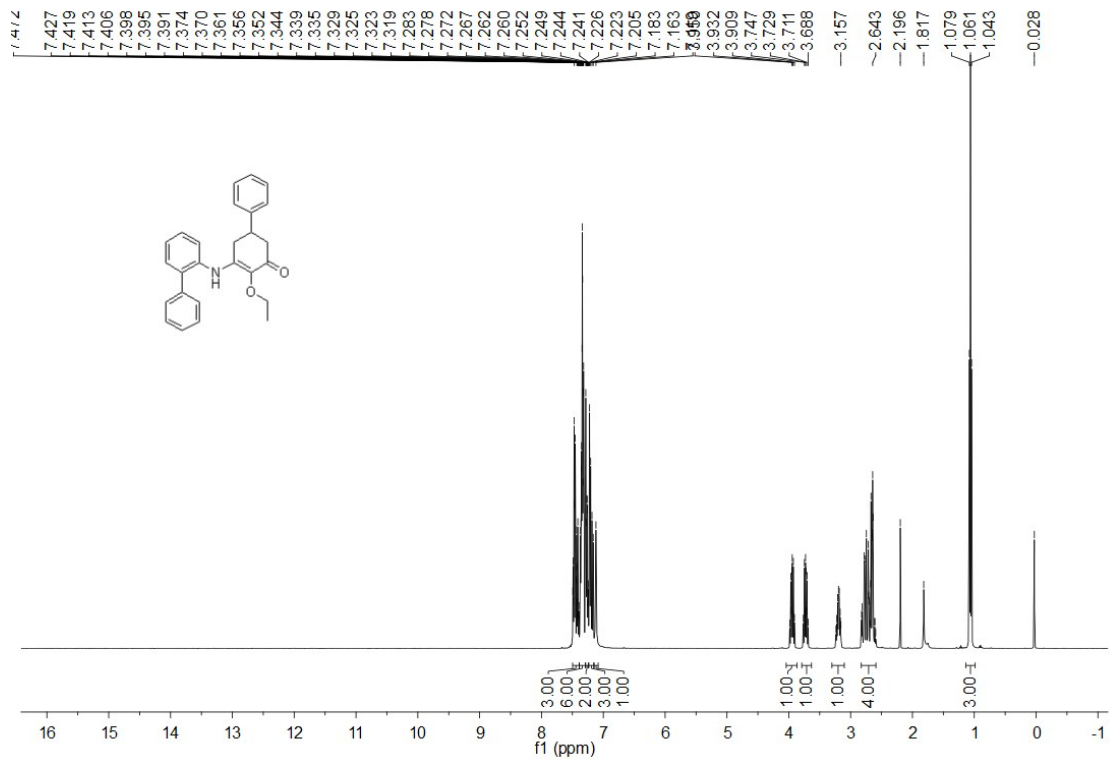

**<sup>1</sup>H NMR Spectrum of Compound 5c**

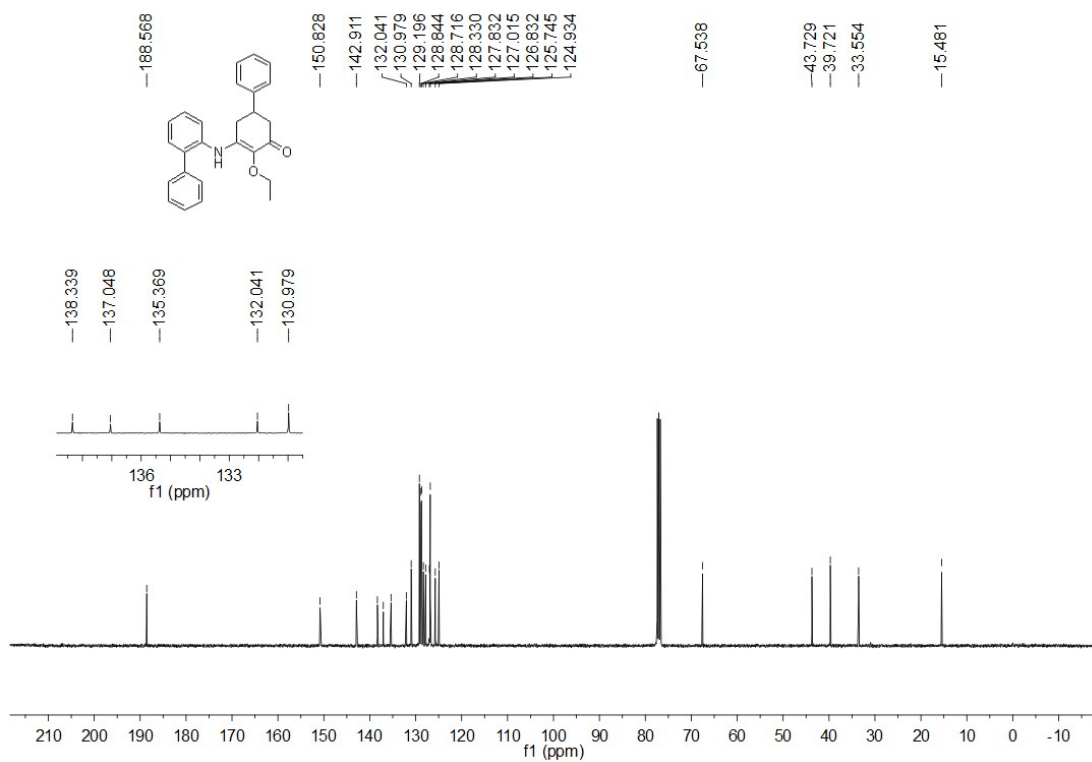

**<sup>13</sup>C NMR Spectrum of Compound 5c**

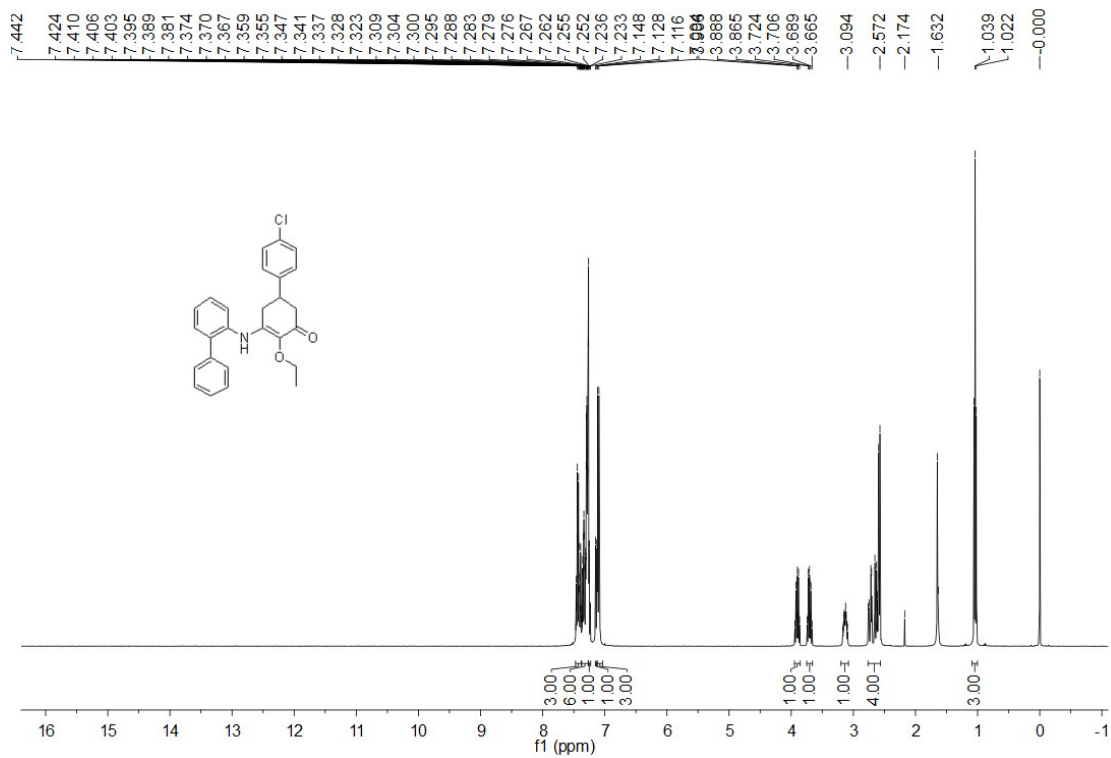

**<sup>1</sup>H NMR Spectrum of Compound 5d**

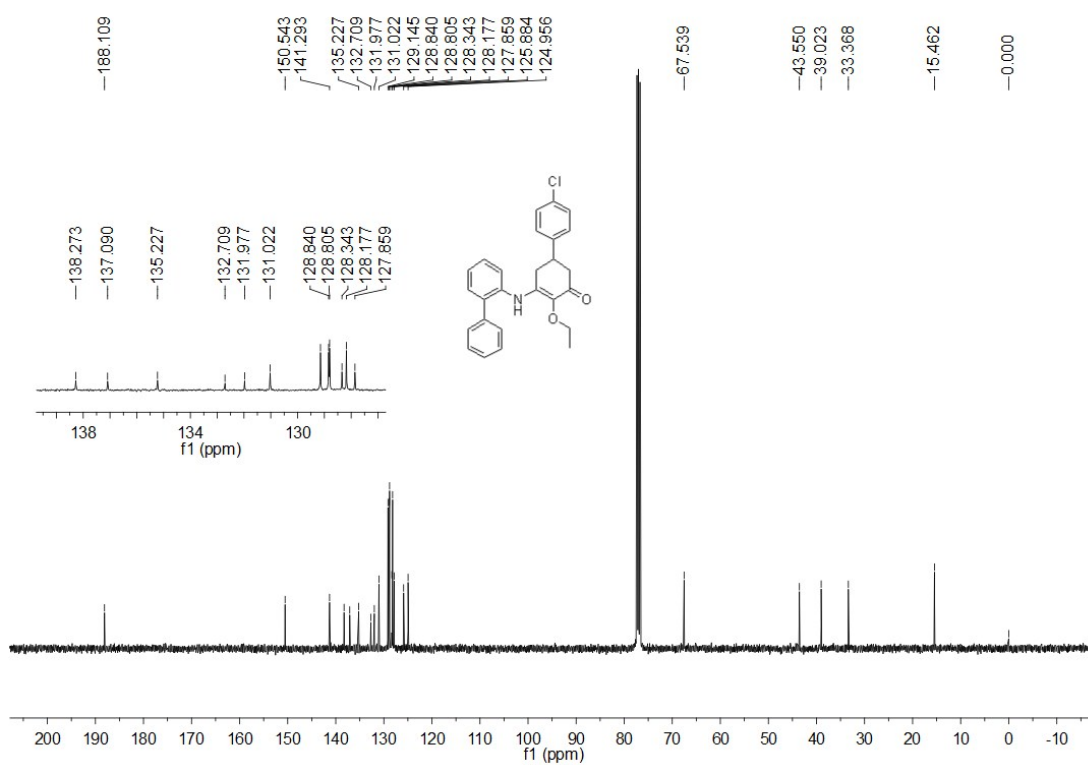

**<sup>13</sup>C NMR Spectrum of Compound 5d**

## X-ray structure of 3a

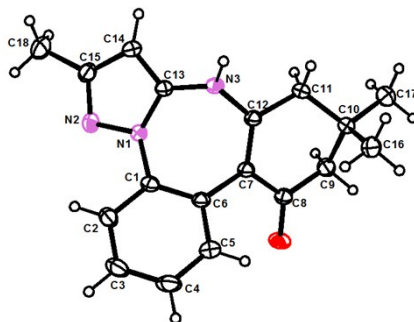

**Table S1.** Crystal Data for Compound **3a**

|                                                     |                                                                                                                                             |
|-----------------------------------------------------|---------------------------------------------------------------------------------------------------------------------------------------------|
| CCDC number                                         | 1976950                                                                                                                                     |
| Formula                                             | C <sub>18</sub> H <sub>19</sub> N <sub>3</sub> O                                                                                            |
| Formula weight                                      | 293.36                                                                                                                                      |
| Temperature                                         | 293(2) K                                                                                                                                    |
| Wavelength                                          | 0.71073 Å                                                                                                                                   |
| Crystal system                                      | Monoclinic                                                                                                                                  |
| Space group                                         | <i>P</i> 2 (1)/ <i>c</i>                                                                                                                    |
| Unit cell dimensions                                | <i>a</i> = 7.2409(13) Å <i>α</i> = 90 deg.<br><i>b</i> = 19.433(4) Å <i>β</i> = 95.667(2) deg.<br><i>c</i> = 10.923(2) Å <i>γ</i> = 90 deg. |
| Volume                                              | 1529.4(5) Å <sup>3</sup>                                                                                                                    |
| <i>Z</i>                                            | 4                                                                                                                                           |
| Density (calculated)                                | 1.274 Mg/m <sup>3</sup>                                                                                                                     |
| Absorption coefficient                              | 0.081 mm <sup>-1</sup>                                                                                                                      |
| <i>F</i> (000)                                      | 624                                                                                                                                         |
| Crystal                                             | 0.23 x 0.21 x 0.20 mm                                                                                                                       |
| Theta range for data collection                     | 2.10 to 25.37 deg.                                                                                                                          |
| Limiting indices                                    | -8 ≤ <i>h</i> ≤ 8, -23 ≤ <i>k</i> ≤ 23, -13 ≤ <i>l</i> ≤ 13                                                                                 |
| Reflections collected                               | 14728                                                                                                                                       |
| Independent reflections                             | 2801 [R(int) = 0.0408]                                                                                                                      |
| Data / restraints / parameters                      | 2801 / 0 / 202                                                                                                                              |
| Goodness-of-fit on <i>F</i> <sup>2</sup>            | 1.042                                                                                                                                       |
| Final <i>R</i> indices [ <i>I</i> > 2σ( <i>I</i> )] | <i>R</i> <sub>1</sub> = 0.0472, <i>wR</i> <sub>2</sub> = 0.1181                                                                             |
| <i>R</i> indices (all data)                         | <i>R</i> <sub>1</sub> = 0.0636, <i>wR</i> <sub>2</sub> = 0.1283                                                                             |
| Largest diff. peak and hole                         | 0.420 and -0.366 e. Å <sup>-3</sup>                                                                                                         |

## X-ray structure of 5b

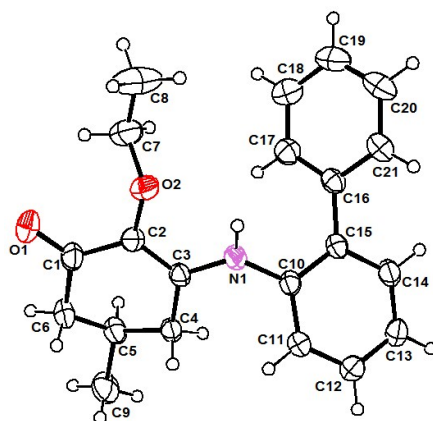

**Table S1.** Crystal Data for Compound **5b**

|                                                     |                                                                                                                          |
|-----------------------------------------------------|--------------------------------------------------------------------------------------------------------------------------|
| CCDC number                                         | 1976897                                                                                                                  |
| Formula                                             | C <sub>21</sub> H <sub>23</sub> NO <sub>2</sub>                                                                          |
| Formula weight                                      | 321.40                                                                                                                   |
| Temperature                                         | 298.15 K                                                                                                                 |
| Wavelength                                          | 0.71073 Å                                                                                                                |
| Crystal system                                      | Monoclinic                                                                                                               |
| Space group                                         | P2 <sub>1</sub> /n                                                                                                       |
| Unit cell dimensions                                | $a = 13.583(3)$ Å $\alpha = 90$ deg.<br>$b = 8.561(2)$ Å $\beta = 97.03(3)$ deg.<br>$c = 15.116(3)$ Å $\gamma = 90$ deg. |
| Volume                                              | 1744.5(7) Å <sup>3</sup>                                                                                                 |
| <i>Z</i>                                            | 4                                                                                                                        |
| Density (calculated)                                | 1.224 Mg/m <sup>3</sup>                                                                                                  |
| Absorption coefficient                              | 0.078 mm <sup>-1</sup>                                                                                                   |
| <i>F</i> (000)                                      | 688                                                                                                                      |
| Crystal                                             | 0.23 x 0.21 x 0.20 mm                                                                                                    |
| Theta range for data collection                     | 5.638 to 55.07 deg.                                                                                                      |
| Limiting indices                                    | -17 ≤ <i>h</i> ≤ 17, -11 ≤ <i>k</i> ≤ 11, -19 ≤ <i>l</i> ≤ 19                                                            |
| Reflections collected                               | 32906                                                                                                                    |
| Independent reflections                             | 4008 [R(int) = 0.0353]                                                                                                   |
| Data / restraints / parameters                      | 4008 / 0 / 219                                                                                                           |
| Goodness-of-fit on <i>F</i> <sup>2</sup>            | 1.036                                                                                                                    |
| Final <i>R</i> indices [ <i>I</i> > 2σ( <i>I</i> )] | $R_1 = 0.0495$ , $wR_2 = 0.1225$                                                                                         |
| <i>R</i> indices (all data)                         | $R_1 = 0.0695$ , $wR_2 = 0.1402$                                                                                         |
| Largest diff. peak and hole                         | 0.20 and -0.20 e. Å <sup>-3</sup>                                                                                        |
